# Supplementary material for: Immune Cell Gene Signatures for Profiling the Microenvironment of Solid Tumors
Source: Oxford University Press journal article supplement (doi:10.1158/2326-6066.cir-18-0342), 2018-09-28
Supplement: 23266066cir180342-sup-202328_2_supp_5032933_pf31xw.xlsx [file 23266066cir180342-sup-202328_2_supp_5032933_pf31xw.xlsx]

## Sheet: Table S1
ImSig signature genes
Signature	HGNC symbols	Gene Name	ENTREZ ID
B cells	AFF3	AF4/FMR2 family, member 3	3899
B cells	BANK1	B-cell scaffold protein with ankyrin repeats 1	55024
B cells	BLK	BLK proto-oncogene, Src family tyrosine kinase	640
B cells	BTLA	B and T lymphocyte associated	151888
B cells	CCR6	chemokine (C-C motif) receptor 6	1235
B cells	CD180	CD180 molecule	4064
B cells	CD19	CD19 molecule	930
B cells	CD22	CD22 molecule	933
B cells	CD37	CD37 molecule	951
B cells	CD72	CD72 molecule	971
B cells	CD79A	CD79a molecule, immunoglobulin-associated alpha	973
B cells	CD79B	CD79b molecule, immunoglobulin-associated beta	974
B cells	CR2	complement component (3d/Epstein Barr virus) receptor 2	1380
B cells	EBF1	early B-cell factor 1	1879
B cells	FAM129C	family with sequence similarity 129, member C	199786
B cells	FCRL1	Fc receptor-like 1	115350
B cells	FCRL2	Fc receptor-like 2	79368
B cells	FCRL3	Fc receptor-like 3	115352
B cells	FCRL5	Fc receptor-like 5	83416
B cells	FCRLA	Fc receptor-like A	84824
B cells	HLA-DOB	major histocompatibility complex, class II, DO beta	3112
B cells	IGHV5-78	immunoglobulin heavy variable 5-78 (pseudogene)	28387
B cells	KIAA0125	KIAA0125	9834
B cells	LINC00926	long intergenic non-protein coding RNA 926	283663
B cells	LOC100507616	uncharacterized LOC100507616	100507616
B cells	LY9	lymphocyte antigen 9	4063
B cells	MS4A1	membrane-spanning 4-domains, subfamily A, member 1	931
B cells	P2RX5	purinergic receptor P2X, ligand-gated ion channel, 5	5026
B cells	PAX5	paired box 5	5079
B cells	PNOC	prepronociceptin	5368
B cells	POU2F2	POU class 2 homeobox 2	5452
B cells	S1PR4	sphingosine-1-phosphate receptor 4	8698
B cells	SNX22	sorting nexin 22	79856
B cells	STAP1	signal transducing adaptor family member 1	26228
B cells	TCL1A	T-cell leukemia/lymphoma 1A	8115
B cells	TLR10	toll-like receptor 10	81793
B cells	VPREB3	pre-B lymphocyte 3	29802
T cells	AMICA1	adhesion molecule, interacts with CXADR antigen 1	120425
T cells	APBB1IP	amyloid beta (A4) precursor protein-binding, family B, member 1 interacting protein	54518
T cells	ARHGAP15	Rho GTPase activating protein 15	55843
T cells	ARHGAP25	Rho GTPase activating protein 25	9938
T cells	ARHGAP9	Rho GTPase activating protein 9	64333
T cells	BIN2	bridging integrator 2	51411
T cells	BTK	Bruton agammaglobulinemia tyrosine kinase	695
T cells	C1orf162	chromosome 1 open reading frame 162	128346
T cells	CCL19	chemokine (C-C motif) ligand 19	6363
T cells	CCR7	chemokine (C-C motif) receptor 7	1236
T cells	CD2	CD2 molecule	914
T cells	CD27	CD27 molecule	939
T cells	CD28	CD28 molecule	940
T cells	CD3D	CD3d molecule, delta (CD3-TCR complex)	915
T cells	CD3E	CD3e molecule, epsilon (CD3-TCR complex)	916
T cells	CD3G	CD3g molecule, gamma (CD3-TCR complex)	917
T cells	CD48	CD48 molecule	962
T cells	CD52	CD52 molecule	1043
T cells	CD6	CD6 molecule	923
T cells	CD8A	CD8a molecule	925
T cells	CD96	CD96 molecule	10225
T cells	CORO1A	coronin, actin binding protein, 1A	11151
T cells	CRTAM	cytotoxic and regulatory T cell molecule	56253
T cells	CXCL9	chemokine (C-X-C motif) ligand 9	4283
T cells	CXCR6	chemokine (C-X-C motif) receptor 6	10663
T cells	CYTIP	cytohesin 1 interacting protein	9595
T cells	DOCK10	dedicator of cytokinesis 10	55619
T cells	DOCK2	dedicator of cytokinesis 2	1794
T cells	DOCK8	dedicator of cytokinesis 8	81704
T cells	DPEP2	dipeptidase 2	64174
T cells	EVI2A	ecotropic viral integration site 2A	2123
T cells	EVI2B	ecotropic viral integration site 2B	2124
T cells	FAM26F	family with sequence similarity 26, member F	441168
T cells	FLI1	Fli-1 proto-oncogene, ETS transcription factor	2313
T cells	FYB	FYN binding protein	2533
T cells	FYN	FYN proto-oncogene, Src family tyrosine kinase	2534
T cells	GAB3	GRB2-associated binding protein 3	139716
T cells	GIMAP2	GTPase, IMAP family member 2	26157
T cells	GIMAP4	GTPase, IMAP family member 4	55303
T cells	GIMAP5	GTPase, IMAP family member 5	55340
T cells	GIMAP6	GTPase, IMAP family member 6	474344
T cells	GIMAP7	GTPase, IMAP family member 7	168537
T cells	GMFG	glia maturation factor, gamma	9535
T cells	GPR171	G protein-coupled receptor 171	29909
T cells	GPR18	G protein-coupled receptor 18	2841
T cells	GZMK	granzyme K (granzyme 3; tryptase II)	3003
T cells	HCST	hematopoietic cell signal transducer	10870
T cells	HMHA1	histocompatibility (minor) HA-1	23526
T cells	HVCN1	hydrogen voltage-gated channel 1	84329
T cells	ICOS	inducible T-cell co-stimulator	29851
T cells	IL10RA	interleukin 10 receptor, alpha	3587
T cells	IL16	interleukin 16	3603
T cells	IL23A	interleukin 23, alpha subunit p19	51561
T cells	IL7R	interleukin 7 receptor	3575
T cells	ITGAL	integrin, alpha L (antigen CD11A (p180), lymphocyte function-associated antigen 1; alpha polypeptide)	3683
T cells	ITK	IL2-inducible T-cell kinase	3702
T cells	KLHL6	kelch-like family member 6	89857
T cells	KLRB1	killer cell lectin-like receptor subfamily B, member 1	3820
T cells	LCP1	lymphocyte cytosolic protein 1 (L-plastin)	3936
T cells	LY86	lymphocyte antigen 86	9450
T cells	NCF1B	neutrophil cytosolic factor 1B pseudogene	654816
T cells	NLRC3	NLR family, CARD domain containing 3	197358
T cells	PARVG	parvin, gamma	64098
T cells	PRKCH	protein kinase C, eta	5583
T cells	PSTPIP1	proline-serine-threonine phosphatase interacting protein 1	9051
T cells	PTPRCAP	protein tyrosine phosphatase, receptor type, C-associated protein	5790
T cells	PVRIG	poliovirus receptor related immunoglobulin domain containing	79037
T cells	RASSF5	Ras association (RalGDS/AF-6) domain family member 5	83593
T cells	RCSD1	RCSD domain containing 1	92241
T cells	RGS18	regulator of G-protein signaling 18	64407
T cells	RHOH	ras homolog family member H	399
T cells	SASH3	SAM and SH3 domain containing 3	54440
T cells	SH2D1A	SH2 domain containing 1A	4068
T cells	SIRPG	signal-regulatory protein gamma	55423
T cells	SLA	Src-like-adaptor	6503
T cells	SP140	SP140 nuclear body protein	11262
T cells	TARP	TCR gamma alternate reading frame protein	445347
T cells	TBC1D10C	TBC1 domain family, member 10C	374403
T cells	TNFRSF9	tumor necrosis factor receptor superfamily, member 9	3604
T cells	TRAC	T cell receptor alpha constant	28755
T cells	TRAF3IP3	TRAF3 interacting protein 3	80342
T cells	TRAT1	T cell receptor associated transmembrane adaptor 1	50852
T cells	TRGC2	T cell receptor gamma constant 2	6967
T cells	TRGV9	T cell receptor gamma variable 9	6983
T cells	UBASH3A	ubiquitin associated and SH3 domain containing A	53347
Macrophages	ADAMDEC1	ADAM-like, decysin 1	27299
Macrophages	ADORA3	adenosine A3 receptor	140
Macrophages	AOAH	acyloxyacyl hydrolase (neutrophil)	313
Macrophages	ARRB2	arrestin, beta 2	409
Macrophages	ATP8B4	ATPase, class I, type 8B, member 4	79895
Macrophages	BCL2A1	BCL2-related protein A1	597
Macrophages	C1orf54	chromosome 1 open reading frame 54	79630
Macrophages	C1QA	complement component 1, q subcomponent, A chain	712
Macrophages	C1QB	complement component 1, q subcomponent, B chain	713
Macrophages	C2	complement component 2	717
Macrophages	C3AR1	complement component 3a receptor 1	719
Macrophages	C5AR1	complement component 5a receptor 1	728
Macrophages	CCR1	chemokine (C-C motif) receptor 1	1230
Macrophages	CCRL2	chemokine (C-C motif) receptor-like 2	9034
Macrophages	CD163	CD163 molecule	9332
Macrophages	CD300A	CD300a molecule	11314
Macrophages	CD4	CD4 molecule	920
Macrophages	CD68	CD68 molecule	968
Macrophages	CD74	CD74 molecule, major histocompatibility complex, class II invariant chain	972
Macrophages	CD86	CD86 molecule	942
Macrophages	CECR1	cat eye syndrome chromosome region, candidate 1	51816
Macrophages	CLEC7A	C-type lectin domain family 7, member A	64581
Macrophages	CMKLR1	chemokine-like receptor 1	1240
Macrophages	CSF1R	colony stimulating factor 1 receptor	1436
Macrophages	CTSB	cathepsin B	1508
Macrophages	CTSS	cathepsin S	1520
Macrophages	CYBB	cytochrome b-245, beta polypeptide	1536
Macrophages	CYTH4	cytohesin 4	27128
Macrophages	DPYD	dihydropyrimidine dehydrogenase	1806
Macrophages	EMR2	egf-like module containing, mucin-like, hormone receptor-like 2	30817
Macrophages	FCER1G	Fc fragment of IgE, high affinity I, receptor for; gamma polypeptide	2207
Macrophages	FCGR1A	Fc fragment of IgG, high affinity Ia, receptor (CD64)	2209
Macrophages	FCGR1B	Fc fragment of IgG, high affinity Ib, receptor (CD64)	2210
Macrophages	FCGR2A	Fc fragment of IgG, low affinity IIa, receptor (CD32)	2212
Macrophages	FCGR3B	Fc fragment of IgG, low affinity IIIb, receptor (CD16b)	2215
Macrophages	FPR3	formyl peptide receptor 3	2359
Macrophages	GPNMB	glycoprotein (transmembrane) nmb	10457
Macrophages	HK3	hexokinase 3 (white cell)	3101
Macrophages	HLA-DRB6	major histocompatibility complex, class II, DR beta 6 (pseudogene)	3128
Macrophages	IFI30	interferon, gamma-inducible protein 30	10437
Macrophages	IGSF6	immunoglobulin superfamily, member 6	10261
Macrophages	ITGAM	integrin, alpha M (complement component 3 receptor 3 subunit)	3684
Macrophages	ITGAX	integrin, alpha X (complement component 3 receptor 4 subunit)	3687
Macrophages	ITGB2	integrin, beta 2 (complement component 3 receptor 3 and 4 subunit)	3689
Macrophages	LAIR1	leukocyte-associated immunoglobulin-like receptor 1	3903
Macrophages	LAPTM5	lysosomal protein transmembrane 5	7805
Macrophages	LILRB4	leukocyte immunoglobulin-like receptor, subfamily B (with TM and ITIM domains), member 4	11006
Macrophages	LIPA	lipase A, lysosomal acid, cholesterol esterase	3988
Macrophages	LY96	lymphocyte antigen 96	23643
Macrophages	MAN2B1	mannosidase, alpha, class 2B, member 1	4125
Macrophages	MFSD1	major facilitator superfamily domain containing 1	64747
Macrophages	MNDA	myeloid cell nuclear differentiation antigen	4332
Macrophages	MS4A4A	membrane-spanning 4-domains, subfamily A, member 4A	51338
Macrophages	MS4A7	membrane-spanning 4-domains, subfamily A, member 7	58475
Macrophages	MSR1	macrophage scavenger receptor 1	4481
Macrophages	MYO1F	myosin IF	4542
Macrophages	NCKAP1L	NCK-associated protein 1-like	3071
Macrophages	NPL	N-acetylneuraminate pyruvate lyase (dihydrodipicolinate synthase)	80896
Macrophages	NR1H3	nuclear receptor subfamily 1, group H, member 3	10062
Macrophages	PLA2G7	phospholipase A2, group VII (platelet-activating factor acetylhydrolase, plasma)	7941
Macrophages	PLEKHO2	pleckstrin homology domain containing, family O member 2	80301
Macrophages	SCPEP1	serine carboxypeptidase 1	59342
Macrophages	SLAMF8	SLAM family member 8	56833
Macrophages	SLC15A3	solute carrier family 15 (oligopeptide transporter), member 3	51296
Macrophages	SLC31A2	solute carrier family 31 (copper transporter), member 2	1318
Macrophages	SLCO2B1	solute carrier organic anion transporter family, member 2B1	11309
Macrophages	SNX10	sorting nexin 10	29887
Macrophages	SPI1	Spi-1 proto-oncogene	6688
Macrophages	TBXAS1	thromboxane A synthase 1 (platelet)	6916
Macrophages	TLR8	toll-like receptor 8	51311
Macrophages	TMEM140	transmembrane protein 140	55281
Macrophages	TNFAIP2	tumor necrosis factor, alpha-induced protein 2	7127
Macrophages	TNFRSF1B	tumor necrosis factor receptor superfamily, member 1B	7133
Macrophages	TNFSF13B	tumor necrosis factor (ligand) superfamily, member 13b	10673
Macrophages	TRPV2	transient receptor potential cation channel, subfamily V, member 2	51393
Macrophages	TYMP	thymidine phosphorylase	1890
Macrophages	TYROBP	TYRO protein tyrosine kinase binding protein	7305
Macrophages	VSIG4	V-set and immunoglobulin domain containing 4	11326
Monocytes	AGTRAP	angiotensin II receptor-associated protein	57085
Monocytes	AIF1	allograft inflammatory factor 1	199
Monocytes	C10orf54	chromosome 10 open reading frame 54	64115
Monocytes	CD14	CD14 molecule	929
Monocytes	CD300LF	CD300 molecule-like family member f	146722
Monocytes	CD33	CD33 molecule	945
Monocytes	CD93	CD93 molecule	22918
Monocytes	CTSD	cathepsin D	1509
Monocytes	EMILIN2	elastin microfibril interfacer 2	84034
Monocytes	FCN1	ficolin (collagen/fibrinogen domain containing) 1	2219
Monocytes	FES	FES proto-oncogene, tyrosine kinase	2242
Monocytes	FGR	FGR proto-oncogene, Src family tyrosine kinase	2268
Monocytes	GNS	glucosamine (N-acetyl)-6-sulfatase	2799
Monocytes	GRN	granulin	2896
Monocytes	HCK	HCK proto-oncogene, Src family tyrosine kinase	3055
Monocytes	HMOX1	heme oxygenase (decycling) 1	3162
Monocytes	KIAA0930	KIAA0930	23313
Monocytes	LILRA6	leukocyte immunoglobulin-like receptor, subfamily A (with TM domain), member 6	79168
Monocytes	LILRB2	leukocyte immunoglobulin-like receptor, subfamily B (with TM and ITIM domains), member 2	10288
Monocytes	LILRB3	leukocyte immunoglobulin-like receptor, subfamily B (with TM and ITIM domains), member 3	11025
Monocytes	LRRC25	leucine rich repeat containing 25	126364
Monocytes	LST1	leukocyte specific transcript 1	7940
Monocytes	NFAM1	NFAT activating protein with ITAM motif 1	150372
Monocytes	NOTCH2	notch 2	4853
Monocytes	PILRA	paired immunoglobin-like type 2 receptor alpha	29992
Monocytes	PLXDC2	plexin domain containing 2	84898
Monocytes	PRAM1	PML-RARA regulated adaptor molecule 1	84106
Monocytes	PSAP	prosaposin	5660
Monocytes	PYCARD	PYD and CARD domain containing	29108
Monocytes	RHOG	ras homolog family member G	391
Monocytes	SERPINA1	serpin peptidase inhibitor, clade A (alpha-1 antiproteinase, antitrypsin), member 1	5265
Monocytes	SLC7A7	solute carrier family 7 (amino acid transporter light chain, y+L system), member 7	9056
Monocytes	TGFBI	transforming growth factor, beta-induced, 68kDa	7045
Monocytes	THEMIS2	thymocyte selection associated family member 2	9473
Monocytes	TIMP2	TIMP metallopeptidase inhibitor 2	7077
Monocytes	TPP1	tripeptidyl peptidase I	1200
Monocytes	VCAN	versican	1462
Neutrophils	ACSL1	acyl-CoA synthetase long-chain family member 1	2180
Neutrophils	ALPK1	alpha-kinase 1	80216
Neutrophils	AQP9	aquaporin 9	366
Neutrophils	BASP1	brain abundant, membrane attached signal protein 1	10409
Neutrophils	BCL6	B-cell CLL/lymphoma 6	604
Neutrophils	CD97	CD97 molecule	976
Neutrophils	CEP19	centrosomal protein 19kDa	84984
Neutrophils	CFLAR	CASP8 and FADD-like apoptosis regulator	8837
Neutrophils	CSF3R	colony stimulating factor 3 receptor (granulocyte)	1441
Neutrophils	CXCR2	chemokine (C-X-C motif) receptor 2	3579
Neutrophils	DENND5A	DENN/MADD domain containing 5A	23258
Neutrophils	DYSF	dysferlin	8291
Neutrophils	FAM65B	family with sequence similarity 65, member B	9750
Neutrophils	FCGR2C	Fc fragment of IgG, low affinity IIc, receptor for (CD32) (gene/pseudogene)	9103
Neutrophils	FPR1	formyl peptide receptor 1	2357
Neutrophils	GLT1D1	glycosyltransferase 1 domain containing 1	144423
Neutrophils	GPR97	G protein-coupled receptor 97	222487
Neutrophils	IFITM2	interferon induced transmembrane protein 2	10581
Neutrophils	IL17RA	interleukin 17 receptor A	23765
Neutrophils	KCNJ2	potassium inwardly-rectifying channel, subfamily J, member 2	3759
Neutrophils	KIAA0247	KIAA0247	9766
Neutrophils	LILRA2	leukocyte immunoglobulin-like receptor, subfamily A (with TM domain), member 2	11027
Neutrophils	LIMK2	LIM domain kinase 2	3985
Neutrophils	LINC01002	long intergenic non-protein coding RNA 1002	399844
Neutrophils	MGAM	maltase-glucoamylase (alpha-glucosidase)	8972
Neutrophils	MOB3A	MOB kinase activator 3A	126308
Neutrophils	NAMPT	nicotinamide phosphoribosyltransferase	10135
Neutrophils	NCF4	neutrophil cytosolic factor 4, 40kDa	4689
Neutrophils	PADI2	peptidyl arginine deiminase, type II	11240
Neutrophils	PHC2	polyhomeotic homolog 2 (Drosophila)	1912
Neutrophils	PHF21A	PHD finger protein 21A	51317
Neutrophils	PLXNC1	plexin C1	10154
Neutrophils	PREX1	phosphatidylinositol-3,4,5-trisphosphate-dependent Rac exchange factor 1	57580
Neutrophils	RALB	v-ral simian leukemia viral oncogene homolog B	5899
Neutrophils	RNF149	ring finger protein 149	284996
Neutrophils	S100A8	S100 calcium binding protein A8	6279
Neutrophils	S100A9	S100 calcium binding protein A9	6280
Neutrophils	SLC25A37	solute carrier family 25 (mitochondrial iron transporter), member 37	51312
Neutrophils	SNORD89	small nucleolar RNA, C/D box 89	692205
Neutrophils	SSH2	slingshot protein phosphatase 2	85464
Neutrophils	STAT3	signal transducer and activator of transcription 3 (acute-phase response factor)	6774
Neutrophils	STAT5B	signal transducer and activator of transcription 5B	6777
Neutrophils	THBD	thrombomodulin	7056
Neutrophils	TLR2	toll-like receptor 2	7097
Neutrophils	TLR4	toll-like receptor 4	7099
Neutrophils	TMEM154	transmembrane protein 154	201799
Neutrophils	TNFRSF1A	tumor necrosis factor receptor superfamily, member 1A	7132
NK cells	KIR2DL1	killer cell immunoglobulin-like receptor, two domains, long cytoplasmic tail, 1	3802
NK cells	KIR2DL2	killer cell immunoglobulin-like receptor, two domains, long cytoplasmic tail, 2	3803
NK cells	KIR2DL3	killer cell immunoglobulin-like receptor, two domains, long cytoplasmic tail, 3	3804
NK cells	KIR2DL4	killer cell immunoglobulin-like receptor, two domains, long cytoplasmic tail, 4	3805
NK cells	KIR2DL5A	killer cell immunoglobulin-like receptor, two domains, long cytoplasmic tail, 5A	57292
NK cells	KIR2DS1	killer cell immunoglobulin-like receptor, two domains, short cytoplasmic tail, 1	3806
NK cells	KIR2DS2	killer cell immunoglobulin-like receptor, two domains, short cytoplasmic tail, 2	100132285
NK cells	KIR2DS3	killer cell immunoglobulin-like receptor, two domains, short cytoplasmic tail, 3	3808
NK cells	KIR2DS5	killer cell immunoglobulin-like receptor, two domains, short cytoplasmic tail, 5	3810
NK cells	KIR3DL1	killer cell immunoglobulin-like receptor, three domains, long cytoplasmic tail, 1	3811
NK cells	KIR3DL2	killer cell immunoglobulin-like receptor, three domains, long cytoplasmic tail, 2	3812
NK cells	KIR3DL3	killer cell immunoglobulin-like receptor three domains long cytoplasmic tail 3	100133046
NK cells	KLRC2	killer cell lectin-like receptor subfamily C, member 2	3822
NK cells	KLRC3	killer cell lectin-like receptor subfamily C, member 3	3823
NK cells	KLRC4	killer cell lectin-like receptor subfamily C, member 4	8302
NK cells	KLRD1	killer cell lectin-like receptor subfamily D, member 1	3824
NK cells	PRF1	perforin 1 (pore forming protein)	5551
NK cells	SAMD3	sterile alpha motif domain containing 3	154075
NK cells	SH2D1B	SH2 domain containing 1B	117157
NK cells	TBX21	T-box 21	30009
Plasma cells	GUSBP11	glucuronidase, beta pseudogene 11	91316
Plasma cells	IGH	immunoglobulin heavy locus	3492
Plasma cells	IGHG3	immunoglobulin heavy constant gamma 3 (G3m marker)	3502
Plasma cells	IGJ	immunoglobulin J polypeptide, linker protein for immunoglobulin alpha and mu polypeptides	3512
Plasma cells	IGKC	immunoglobulin kappa constant	3514
Plasma cells	IGKV1D-13	immunoglobulin kappa variable 1D-13	28902
Plasma cells	IGLC1	immunoglobulin lambda constant 1 (Mcg marker)	3537
Plasma cells	IGLJ3	immunoglobulin lambda joining 3	28831
Plasma cells	IGLL3P	immunoglobulin lambda-like polypeptide 3, pseudogene	91353
Plasma cells	IGLV@	immunoglobulin lambda variable cluster	3546
Plasma cells	IGLV1-44	immunoglobulin lambda variable 1-44	28823
Plasma cells	MZB1	marginal zone B and B1 cell-specific protein	51237
Plasma cells	TNFRSF17	tumor necrosis factor receptor superfamily, member 17	608
Plasma cells	TXNDC5	thioredoxin domain containing 5 (endoplasmic reticulum)	81567
Interferon	APOL1	apolipoprotein L, 1	8542
Interferon	APOL6	apolipoprotein L, 6	80830
Interferon	BATF2	basic leucine zipper transcription factor, ATF-like 2	116071
Interferon	BST2	bone marrow stromal cell antigen 2	684
Interferon	C19orf66	chromosome 19 open reading frame 66	55337
Interferon	C5orf56	chromosome 5 open reading frame 56	441108
Interferon	CMPK2	cytidine monophosphate (UMP-CMP) kinase 2, mitochondrial	129607
Interferon	DDX58	DEAD (Asp-Glu-Ala-Asp) box polypeptide 58	23586
Interferon	DDX60	DEAD (Asp-Glu-Ala-Asp) box polypeptide 60	55601
Interferon	DHX58	DEXH (Asp-Glu-X-His) box polypeptide 58	79132
Interferon	DTX3L	deltex 3 like, E3 ubiquitin ligase	151636
Interferon	EPSTI1	epithelial stromal interaction 1 (breast)	94240
Interferon	FBXO6	F-box protein 6	26270
Interferon	GBP1	guanylate binding protein 1, interferon-inducible	2633
Interferon	GBP4	guanylate binding protein 4	115361
Interferon	HELZ2	helicase with zinc finger 2, transcriptional coactivator	85441
Interferon	HERC5	HECT and RLD domain containing E3 ubiquitin protein ligase 5	51191
Interferon	HERC6	HECT and RLD domain containing E3 ubiquitin protein ligase family member 6	55008
Interferon	HSH2D	hematopoietic SH2 domain containing	84941
Interferon	IFI16	interferon, gamma-inducible protein 16	3428
Interferon	IFI35	interferon-induced protein 35	3430
Interferon	IFI44	interferon-induced protein 44	10561
Interferon	IFI44L	interferon-induced protein 44-like	10964
Interferon	IFI6	interferon, alpha-inducible protein 6	2537
Interferon	IFIH1	interferon induced with helicase C domain 1	64135
Interferon	IFIT1	interferon-induced protein with tetratricopeptide repeats 1	3434
Interferon	IFIT2	interferon-induced protein with tetratricopeptide repeats 2	3433
Interferon	IFIT3	interferon-induced protein with tetratricopeptide repeats 3	3437
Interferon	IFIT5	interferon-induced protein with tetratricopeptide repeats 5	24138
Interferon	IFITM1	interferon induced transmembrane protein 1	8519
Interferon	IRF7	interferon regulatory factor 7	3665
Interferon	IRF9	interferon regulatory factor 9	10379
Interferon	ISG15	ISG15 ubiquitin-like modifier	9636
Interferon	LAMP3	lysosomal-associated membrane protein 3	27074
Interferon	LAP3	leucine aminopeptidase 3	51056
Interferon	MX1	MX dynamin-like GTPase 1	4599
Interferon	MX2	MX dynamin-like GTPase 2	4600
Interferon	OAS2	2'-5'-oligoadenylate synthetase 2, 69/71kDa	4939
Interferon	OAS3	2'-5'-oligoadenylate synthetase 3, 100kDa	4940
Interferon	OASL	2'-5'-oligoadenylate synthetase-like	8638
Interferon	PARP10	poly (ADP-ribose) polymerase family, member 10	84875
Interferon	PARP12	poly (ADP-ribose) polymerase family, member 12	64761
Interferon	PARP14	poly (ADP-ribose) polymerase family, member 14	54625
Interferon	PARP9	poly (ADP-ribose) polymerase family, member 9	83666
Interferon	PHF11	PHD finger protein 11	51131
Interferon	PML	promyelocytic leukemia	5371
Interferon	PSMB9	proteasome (prosome, macropain) subunit, beta type, 9	5698
Interferon	RNF213	ring finger protein 213	57674
Interferon	RSAD2	radical S-adenosyl methionine domain containing 2	91543
Interferon	RTP4	receptor (chemosensory) transporter protein 4	64108
Interferon	SAMD9	sterile alpha motif domain containing 9	54809
Interferon	SAMD9L	sterile alpha motif domain containing 9-like	219285
Interferon	SHISA5	shisa family member 5	51246
Interferon	SIGLEC1	sialic acid binding Ig-like lectin 1, sialoadhesin	6614
Interferon	SP110	SP110 nuclear body protein	3431
Interferon	STAT1	signal transducer and activator of transcription 1, 91kDa	6772
Interferon	STAT2	signal transducer and activator of transcription 2, 113kDa	6773
Interferon	TAP1	transporter 1, ATP-binding cassette, sub-family B (MDR/TAP)	6890
Interferon	TRAFD1	TRAF-type zinc finger domain containing 1	10906
Interferon	TRIM21	tripartite motif containing 21	6737
Interferon	TRIM22	tripartite motif containing 22	10346
Interferon	TRIM5	tripartite motif containing 5	85363
Interferon	UBE2L6	ubiquitin-conjugating enzyme E2L 6	9246
Interferon	USP18	ubiquitin specific peptidase 18	11274
Interferon	XAF1	XIAP associated factor 1	54739
Interferon	ZNFX1	zinc finger, NFX1-type containing 1	57169
Proliferation	ANLN	anillin, actin binding protein	54443
Proliferation	ASPM	asp (abnormal spindle) homolog, microcephaly associated (Drosophila)	259266
Proliferation	AURKA	aurora kinase A	6790
Proliferation	AURKB	aurora kinase B	9212
Proliferation	BIRC5	baculoviral IAP repeat containing 5	332
Proliferation	BUB1	BUB1 mitotic checkpoint serine/threonine kinase	699
Proliferation	BUB1B	BUB1 mitotic checkpoint serine/threonine kinase B	701
Proliferation	CASC5	cancer susceptibility candidate 5	57082
Proliferation	CCNA2	cyclin A2	890
Proliferation	CCNB1	cyclin B1	891
Proliferation	CCNB2	cyclin B2	9133
Proliferation	CCNE2	cyclin E2	9134
Proliferation	CDC20	cell division cycle 20	991
Proliferation	CDC6	cell division cycle 6	990
Proliferation	CDCA2	cell division cycle associated 2	157313
Proliferation	CDCA3	cell division cycle associated 3	83461
Proliferation	CDCA5	cell division cycle associated 5	113130
Proliferation	CDCA7	cell division cycle associated 7	83879
Proliferation	CDCA8	cell division cycle associated 8	55143
Proliferation	CDK1	cyclin-dependent kinase 1	983
Proliferation	CDKN3	cyclin-dependent kinase inhibitor 3	1033
Proliferation	CDT1	chromatin licensing and DNA replication factor 1	81620
Proliferation	CENPA	centromere protein A	1058
Proliferation	CENPE	centromere protein E, 312kDa	1062
Proliferation	CENPF	centromere protein F, 350/400kDa	1063
Proliferation	CENPL	centromere protein L	91687
Proliferation	CEP55	centrosomal protein 55kDa	55165
Proliferation	CKS1B	CDC28 protein kinase regulatory subunit 1B	1163
Proliferation	DEPDC1	DEP domain containing 1	55635
Proliferation	DEPDC1B	DEP domain containing 1B	55789
Proliferation	DLGAP5	discs, large (Drosophila) homolog-associated protein 5	9787
Proliferation	DONSON	downstream neighbor of SON	29980
Proliferation	DTL	denticleless E3 ubiquitin protein ligase homolog (Drosophila)	51514
Proliferation	E2F8	E2F transcription factor 8	79733
Proliferation	ECT2	epithelial cell transforming 2	1894
Proliferation	EZH2	enhancer of zeste 2 polycomb repressive complex 2 subunit	2146
Proliferation	FAM72C	family with sequence similarity 72, member C	554282
Proliferation	FANCI	Fanconi anemia, complementation group I	55215
Proliferation	FBXO5	F-box protein 5	26271
Proliferation	FOXM1	forkhead box M1	2305
Proliferation	GINS1	GINS complex subunit 1 (Psf1 homolog)	9837
Proliferation	GINS2	GINS complex subunit 2 (Psf2 homolog)	51659
Proliferation	GMNN	geminin, DNA replication inhibitor	51053
Proliferation	HJURP	Holliday junction recognition protein	55355
Proliferation	HMGB3	high mobility group box 3	3149
Proliferation	HMMR	hyaluronan-mediated motility receptor (RHAMM)	3161
Proliferation	KIAA0101	KIAA0101	9768
Proliferation	KIF11	kinesin family member 11	3832
Proliferation	KIF14	kinesin family member 14	9928
Proliferation	KIF15	kinesin family member 15	56992
Proliferation	KIF18B	kinesin family member 18B	146909
Proliferation	KIF20A	kinesin family member 20A	10112
Proliferation	KIF2C	kinesin family member 2C	11004
Proliferation	KIF4A	kinesin family member 4A	24137
Proliferation	MAD2L1	MAD2 mitotic arrest deficient-like 1 (yeast)	4085
Proliferation	MCM10	minichromosome maintenance complex component 10	55388
Proliferation	MCM2	minichromosome maintenance complex component 2	4171
Proliferation	MCM4	minichromosome maintenance complex component 4	4173
Proliferation	MCM6	minichromosome maintenance complex component 6	4175
Proliferation	MELK	maternal embryonic leucine zipper kinase	9833
Proliferation	MKI67	marker of proliferation Ki-67	4288
Proliferation	MND1	meiotic nuclear divisions 1 homolog (S. cerevisiae)	84057
Proliferation	MTFR2	mitochondrial fission regulator 2	113115
Proliferation	NCAPG	non-SMC condensin I complex, subunit G	64151
Proliferation	NCAPG2	non-SMC condensin II complex, subunit G2	54892
Proliferation	NDC80	NDC80 kinetochore complex component	10403
Proliferation	NEK2	NIMA-related kinase 2	4751
Proliferation	NUF2	NUF2, NDC80 kinetochore complex component	83540
Proliferation	NUSAP1	nucleolar and spindle associated protein 1	51203
Proliferation	OIP5	Opa interacting protein 5	11339
Proliferation	PARPBP	PARP1 binding protein	55010
Proliferation	PBK	PDZ binding kinase	55872
Proliferation	PCNA	proliferating cell nuclear antigen	5111
Proliferation	PLK4	polo-like kinase 4	10733
Proliferation	POLE2	polymerase (DNA directed), epsilon 2, accessory subunit	5427
Proliferation	POLQ	polymerase (DNA directed), theta	10721
Proliferation	PTTG1	pituitary tumor-transforming 1	9232
Proliferation	RACGAP1	Rac GTPase activating protein 1	29127
Proliferation	RAD51	RAD51 recombinase	5888
Proliferation	RAD51AP1	RAD51 associated protein 1	10635
Proliferation	RRM1	ribonucleotide reductase M1	6240
Proliferation	RRM2	ribonucleotide reductase M2	6241
Proliferation	SHCBP1	SHC SH2-domain binding protein 1	79801
Proliferation	SKA1	spindle and kinetochore associated complex subunit 1	220134
Proliferation	SMC2	structural maintenance of chromosomes 2	10592
Proliferation	SPC25	SPC25, NDC80 kinetochore complex component	57405
Proliferation	STIL	SCL/TAL1 interrupting locus	6491
Proliferation	STMN1	stathmin 1	3925
Proliferation	TCF19	transcription factor 19	6941
Proliferation	TK1	thymidine kinase 1, soluble	7083
Proliferation	TOP2A	topoisomerase (DNA) II alpha 170kDa	7153
Proliferation	TPX2	TPX2, microtubule-associated	22974
Proliferation	TRIP13	thyroid hormone receptor interactor 13	9319
Proliferation	TTK	TTK protein kinase	7272
Proliferation	TYMS	thymidylate synthetase	7298
Proliferation	UBE2C	ubiquitin-conjugating enzyme E2C	11065
Proliferation	UHRF1	ubiquitin-like with PHD and ring finger domains 1	29128
Proliferation	ZWILCH	zwilch kinetochore protein	55055
Proliferation	ZWINT	ZW10 interacting kinetochore protein	11130
Translation	EEF1A1	eukaryotic translation elongation factor 1 alpha 1	1915
Translation	EEF1B2	eukaryotic translation elongation factor 1 beta 2	1933
Translation	EEF1D	eukaryotic translation elongation factor 1 delta (guanine nucleotide exchange protein)	1936
Translation	EEF1G	eukaryotic translation elongation factor 1 gamma	1937
Translation	EIF3D	eukaryotic translation initiation factor 3, subunit D	8664
Translation	EIF3E	eukaryotic translation initiation factor 3, subunit E	3646
Translation	EIF3F	eukaryotic translation initiation factor 3, subunit F	8665
Translation	EIF3G	eukaryotic translation initiation factor 3, subunit G	8666
Translation	EIF3H	eukaryotic translation initiation factor 3, subunit H	8667
Translation	EIF3K	eukaryotic translation initiation factor 3, subunit K	27335
Translation	FAU	Finkel-Biskis-Reilly murine sarcoma virus (FBR-MuSV) ubiquitously expressed	2197
Translation	GNB2L1	guanine nucleotide binding protein (G protein), beta polypeptide 2-like 1	10399
Translation	NACA	nascent polypeptide-associated complex alpha subunit	4666
Translation	PFDN5	prefoldin subunit 5	5204
Translation	RPL10	ribosomal protein L10	6134
Translation	RPL10L	ribosomal protein L10-like	140801
Translation	RPL11	ribosomal protein L11	6135
Translation	RPL12	ribosomal protein L12	6136
Translation	RPL13	ribosomal protein L13	6137
Translation	RPL13A	ribosomal protein L13a	23521
Translation	RPL14	ribosomal protein L14	9045
Translation	RPL15	ribosomal protein L15	6138
Translation	RPL17	ribosomal protein L17	6139
Translation	RPL18	ribosomal protein L18	6141
Translation	RPL18A	ribosomal protein L18a	6142
Translation	RPL19	ribosomal protein L19	6143
Translation	RPL21	ribosomal protein L21	6144
Translation	RPL22	ribosomal protein L22	6146
Translation	RPL23	ribosomal protein L23	9349
Translation	RPL23A	ribosomal protein L23a	6147
Translation	RPL24	ribosomal protein L24	6152
Translation	RPL27	ribosomal protein L27	6155
Translation	RPL27A	ribosomal protein L27a	6157
Translation	RPL28	ribosomal protein L28	6158
Translation	RPL29	ribosomal protein L29	6159
Translation	RPL3	ribosomal protein L3	6122
Translation	RPL30	ribosomal protein L30	6156
Translation	RPL31	ribosomal protein L31	6160
Translation	RPL32	ribosomal protein L32	6161
Translation	RPL34	ribosomal protein L34	6164
Translation	RPL35	ribosomal protein L35	11224
Translation	RPL35A	ribosomal protein L35a	6165
Translation	RPL36A	ribosomal protein L36a	6173
Translation	RPL37	ribosomal protein L37	6167
Translation	RPL37A	ribosomal protein L37a	6168
Translation	RPL38	ribosomal protein L38	6169
Translation	RPL39	ribosomal protein L39	6170
Translation	RPL4	ribosomal protein L4	6124
Translation	RPL5	ribosomal protein L5	6125
Translation	RPL6	ribosomal protein L6	6128
Translation	RPL7	ribosomal protein L7	6129
Translation	RPL7A	ribosomal protein L7a	6130
Translation	RPL8	ribosomal protein L8	6132
Translation	RPL9	ribosomal protein L9	6133
Translation	RPLP0	ribosomal protein, large, P0	6175
Translation	RPLP2	ribosomal protein, large, P2	6181
Translation	RPS10	ribosomal protein S10	6204
Translation	RPS11	ribosomal protein S11	6205
Translation	RPS13	ribosomal protein S13	6207
Translation	RPS14	ribosomal protein S14	6208
Translation	RPS15	ribosomal protein S15	6209
Translation	RPS15A	ribosomal protein S15a	6210
Translation	RPS16	ribosomal protein S16	6217
Translation	RPS17	ribosomal protein S17	6218
Translation	RPS18	ribosomal protein S18	6222
Translation	RPS19	ribosomal protein S19	6223
Translation	RPS2	ribosomal protein S2	6187
Translation	RPS20	ribosomal protein S20	6224
Translation	RPS21	ribosomal protein S21	6227
Translation	RPS23	ribosomal protein S23	6228
Translation	RPS25	ribosomal protein S25	6230
Translation	RPS27A	ribosomal protein S27a	6233
Translation	RPS28	ribosomal protein S28	6234
Translation	RPS29	ribosomal protein S29	6235
Translation	RPS3	ribosomal protein S3	6188
Translation	RPS3A	ribosomal protein S3A	6189
Translation	RPS5	ribosomal protein S5	6193
Translation	RPS6	ribosomal protein S6	6194
Translation	RPS7	ribosomal protein S7	6201
Translation	RPS8	ribosomal protein S8	6202
Translation	RPS9	ribosomal protein S9	6203
Translation	RPSA	ribosomal protein SA	3921
Translation	SNHG6	small nucleolar RNA host gene 6 (non-protein coding)	641638
Translation	SNHG8	small nucleolar RNA host gene 8 (non-protein coding)	100093630
Translation	SNRPD2	small nuclear ribonucleoprotein D2 polypeptide 16.5kDa	6633
Translation	UXT	ubiquitously-expressed, prefoldin-like chaperone	8409

## Sheet: Table S2
Top 5 GO term enrichment of ImSig
Signature	GO.ID	Term	Annotated	Significant	Expected	p-value
B cells	GO:0006955	immune response	1379	16	2.48	1.8e-10
B cells	GO:0050853	B cell receptor signaling pathway	39	5	0.07	7.2e-09
B cells	GO:0002376	immune system process	2247	17	4.04	2.6e-08
B cells	GO:0042113	B cell activation	200	7	0.36	5e-08
B cells	GO:0042100	B cell proliferation	79	5	0.14	2.7e-07
T cells	GO:0042110	T cell activation	395	29	2.01	2.7e-26
T cells	GO:0046649	lymphocyte activation	546	31	2.78	8.6e-25
T cells	GO:0045321	leukocyte activation	639	31	3.25	9.5e-23
T cells	GO:0006955	immune response	1379	41	7.02	1.3e-22
T cells	GO:0002376	immune system process	2247	49	11.43	5.8e-22
Macrophages	GO:0006955	immune response	1379	39	6.5	4e-22
Macrophages	GO:0002376	immune system process	2247	47	10.59	5e-22
Macrophages	GO:0006952	defense response	1459	39	6.88	3.1e-21
Macrophages	GO:0002682	regulation of immune system process	1146	35	5.4	1.3e-20
Macrophages	GO:0002684	positive regulation of immune system process	700	29	3.3	2.1e-20
Monocytes	GO:0002376	immune system process	2247	21	4.88	3.2e-10
Monocytes	GO:0001775	cell activation	866	14	1.88	1.2e-09
Monocytes	GO:0002682	regulation of immune system process	1146	15	2.49	4.6e-09
Monocytes	GO:0002694	regulation of leukocyte activation	381	10	0.83	5.2e-09
Monocytes	GO:0050865	regulation of cell activation	411	10	0.89	1.1e-08
Neutrophils	GO:0050727	regulation of inflammatory response	243	9	0.65	1.3e-08
Neutrophils	GO:1903034	regulation of response to wounding	344	10	0.92	1.8e-08
Neutrophils	GO:0006954	inflammatory response	566	12	1.51	1.8e-08
Neutrophils	GO:0050729	positive regulation of inflammatory response	78	6	0.21	5.6e-08
Neutrophils	GO:0009605	response to external stimulus	1942	19	5.18	1.4e-07
NK cells	GO:0006968	cellular defense response	60	7	0.06	1.3e-13
NK cells	GO:0006955	immune response	1379	14	1.45	5.6e-13
NK cells	GO:0050776	regulation of immune response	777	11	0.82	2.9e-11
NK cells	GO:0002376	immune system process	2247	14	2.37	4.5e-10
NK cells	GO:0006952	defense response	1459	12	1.54	1.2e-09
Plasma cells	GO:0006959	humoral immune response	170	4	0.07	4.1e-07
Plasma cells	GO:0006909	phagocytosis	194	4	0.08	6.9e-07
Plasma cells	GO:0006958	complement activation, classical pathway	51	3	0.02	1e-06
Plasma cells	GO:0002250	adaptive immune response	254	4	0.11	2e-06
Plasma cells	GO:0001895	retina homeostasis	64	3	0.03	2.1e-06
Interferon	GO:0051607	defense response to virus	204	28	0.77	< 1e-30
Interferon	GO:0009615	response to virus	301	29	1.14	< 1e-30
Interferon	GO:0098542	defense response to other organism	379	29	1.43	< 1e-30
Interferon	GO:0045087	innate immune response	861	35	3.26	4.9e-29
Interferon	GO:0060337	type I interferon signaling pathway	76	18	0.29	1.7e-28
Translation	GO:0006414	translational elongation	123	72	0.64	<1e-30
Translation	GO:0006415	translational termination	95	68	0.5	<1e-30
Translation	GO:0006614	SRP-dependent cotranslational protein targeting to membrane	107	68	0.56	<1e-30
Translation	GO:0006613	cotranslational protein targeting to membrane	109	68	0.57	<1e-30
Translation	GO:0000184	nuclear-transcribed mRNA catabolic process, nonsense-mediated decay	118	69	0.61	<1e-30
Proliferation	GO:0000278	mitotic cell cycle	899	72	5.47	<1e-30
Proliferation	GO:0007049	cell cycle	1555	82	9.45	<1e-30
Proliferation	GO:1903047	mitotic cell cycle process	780	65	4.74	<1e-30
Proliferation	GO:0022402	cell cycle process	1157	71	7.03	<1e-30
Proliferation	GO:0048285	organelle fission	544	52	3.31	<1e-30

## Sheet: Table S3
Gene content of seven published blood-derived signatures and ImSig (ordered on most commonly used)
Genes	ImSig	Becht et al.	Angelova et al.	Abbas et al. 2009	Watkins et al.	Bindea et al.	Abbas et al. 2005	Newman et al.	Count
CSF3R	Neutrophils	Neutrophils	Macrophages	Neutrophils	Neutrophils	Neutrophils	Myeloid	common genes	8
FCGR3B	Macrophages	Neutrophils	TGD	Neutrophils	Neutrophils	Neutrophils	Neutrophils	Neutrophils	8
KLRD1	NK cells	Cytotoxic cells	Effectormemory CD8		NK cells	Cytotoxic cells	Lymphoid	common genes	7
FPR1	Neutrophils	Neutrophils	Neutrophils		Neutrophils	Neutrophils	Myeloid	common genes	7
CD8A	T cells	Cytotoxic cells	T cells		T cells CD8	T cells CD8	T cells	common genes	7
CD1B		Myeloid dendritic cells	T cells	Dendritic cells resting	Monocytes	iDC	Dendritic Cells	common genes	7
TNFRSF17	Plasma cells		B cells activated	Plasma cells	B cells	B cells		common genes	6
BANK1	B cells	B lineage	Immature Bcells		B cells		B cells	common genes	6
FCRL2	B cells	B lineage	Immature Bcells		B cells	B cells		common genes	6
PNOC	B cells		Immature Bcells		B cells	B cells	B cells	common genes	6
CR2	B cells	B lineage	MDSC		B cells	B cells		common genes	6
FCN1	Monocytes		Monocytes	Monocytes	Monocytes		Myeloid	Monocytes	6
GNLY		Cytotoxic cells	NKT cells		NK cells	Cytotoxic cells	Lymphoid	common genes	6
KIR2DL1	NK cells	NK cells	NKT cells		NK cells		Lymphoid	common genes	6
KIR3DL1	NK cells	NK cells	NKT cells		NK cells	NK56 dim	NK cells		6
KIR3DL2	NK cells		NKT cells		NK cells	NK56 dim	NK cells	common genes	6
CD1E		Myeloid dendritic cells	T cells	Dendritic cells resting		iDC	Dendritic Cells	common genes	6
CD1A		Myeloid dendritic cells	T cells	Dendritic cells resting		iDC	Dendritic Cells	Dendritic cells resting	6
CD3D	T cells	T cells	T cells			T cells	T cells	common genes	6
CD3G	T cells	T cells	T cells			T cells	T cells	common genes	6
PRF1	NK cells		T cells		NK cells	T cells CD8	Lymphoid	common genes	6
PLA2G7	Macrophages	Monocytic lineage	TGD		Monocytes		Myeloid	common genes	6
CSF1R	Macrophages	Monocytic lineage	TGD		Monocytes	iDC	Myeloid		6
CLEC10A		Myeloid dendritic cells	TGD	Dendritic cells resting	Monocytes	iDC		common genes	6
TRAT1	T cells	T cells	Th1		T cells CD4	T cells		common genes	6
CD6	T cells	T cells	Th1			T helper cells	T cells	common genes	6
CTLA4		T cells	Treg		T cells CD4	Th1	T cells	common genes	6
CD19	B cells	B lineage			B cells	B cells	B cells	common genes	6
ICOS	T cells	T cells			T cells CD4	T helper cells	T cells	common genes	6
CD2	T cells		B cells activated			T cells	Lymphoid	common genes	5
DPEP2	T cells		Centralmemory CD4		Neutrophils		Myeloid	common genes	5
KLRB1	T cells		Cytotoxic cells			Cytotoxic cells	Lymphoid	common genes	5
CLIC2		Myeloid dendritic cells	Dendritic cells	Dendritic cells activated			Dendritic Cells	common genes	5
CD86	Macrophages		Dendritic cells		Monocytes		Dendritic Cells	Dendritic cells activated	5
CCL13			Dendritic cells	Dendritic cells activated		Dendritic cells	Dendritic Cells	common genes	5
CD22	B cells	B lineage	Immature Bcells		B cells			common genes	5
STAP1	B cells	B lineage	Immature Bcells		B cells			common genes	5
HLA-DOB	B cells		Immature Bcells		B cells	B cells		common genes	5
HLA-DQA1			Immature Bcells		B cells	B cells	Dendritic Cells	Dendritic cells resting	5
CYBB	Macrophages		Immature Bcells		Monocytes	Macrophages	Monocytes		5
CD163	Macrophages		Macrophages	Monocytes	Monocytes	Macrophages			5
CLC			Mast cells		Neutrophils	Eosinophils	Neutrophils	common genes	5
PROK2		Neutrophils	Neutrophils	Neutrophils	Neutrophils		Neutrophils		5
VNN2			Neutrophils	Neutrophils	Neutrophils		Neutrophils	common genes	5
LST1	Monocytes		NK cells		Neutrophils		Myeloid	common genes	5
CD28	T cells	T cells	T cells			T cells		common genes	5
CCR3			T cells		Neutrophils	Eosinophils	Neutrophils	Neutrophils	5
LILRB2	Monocytes		T cells			Neutrophils	Myeloid	common genes	5
CD3E	T cells		T cells			T helper cells	T cells	common genes	5
CXCR6	T cells		T cells			Th2	T cells	TGD	5
GPR18	T cells		TFH		B cells		Lymphoid	common genes	5
NPL	Macrophages	Neutrophils	TGD				Myeloid	Macrophages M2	5
MS4A6A			TGD		Monocytes	iDC	Monocytes	common genes	5
MNDA	Macrophages		TGD		Neutrophils		Myeloid	common genes	5
HCK	Monocytes		TGD		Neutrophils		Myeloid	Monocytes	5
P2RX5	B cells		Th1		B cells		Lymphoid	common genes	5
EBI3			Th1		B cells	Dendritic cells activated	Myeloid	common genes	5
CD68	Macrophages		Th1		Monocytes	Macrophages		common genes	5
IGSF6	Macrophages		Th1		Neutrophils		Myeloid	common genes	5
CD96	T cells		Th1			T helper cells	Lymphoid	common genes	5
LTA			Th1	T cells activated		Th1	Lymphoid	common genes	5
CEACAM3		Neutrophils	Th17		Neutrophils	Neutrophils		Neutrophils	5
CD72	B cells		Treg		B cells	B cells		common genes	5
CD79A	B cells	B lineage			B cells		B cells	common genes	5
CD79B	B cells	B lineage			B cells		B cells	common genes	5
VPREB3	B cells	B lineage			B cells		B cells	common genes	5
MS4A1	B cells	B lineage			B cells	B cells		common genes	5
IGKC	Plasma cells	B lineage		Plasma cells		B cells		common genes	5
KLRC3	NK cells	Cytotoxic cells			NK cells		Lymphoid	common genes	5
TNFRSF10C		Neutrophils		Neutrophils	Neutrophils	Neutrophils		Neutrophils	5
CD160		NK cells			NK cells	TGD	Lymphoid	common genes	5
KIR2DL4	NK cells	NK cells			NK cells		NK cells	NK cells activated	5
CD8B		T cells CD8		Resting cytotoxic T cells	T cells CD8	T cells CD8		common genes	5
TCL1A	B cells				B cells	B cells	B cells	B cells naive	5
BLK	B cells				B cells	B cells	B cells	common genes	5
PAX5	B cells	B lineage	B cells activated				B cells		4
CD37	B cells		B cells activated		B cells			common genes	4
AIM2			Centralmemory CD4		B cells		Lymphoid	B cells memory	4
TTYH2			Dendritic cells	Dendritic cells activated	Monocytes		Dendritic Cells		4
TNFAIP2	Macrophages		Dendritic cells		Neutrophils		Myeloid		4
PLXNC1	Neutrophils	Neutrophils	Effectormemory CD8		Neutrophils				4
SH2D1B	NK cells	NK cells	Effectormemory CD8		NK cells				4
IL2RB			Effectormemory CD8		NK cells		Lymphoid	common genes	4
CCL4			Effectormemory CD8		NK cells	Th1		common genes	4
GZMH			Effectormemory CD8			Cytotoxic cells	Lymphoid	common genes	4
RGS18	T cells		Effectormemory CD8	Neutrophils			Myeloid		4
RNASE2			Eosinophils			Eosinophils	Myeloid	common genes	4
DPYD	Macrophages		iDC		Monocytes		Myeloid		4
C1QB	Macrophages		iDC	Dendritic cells resting	Monocytes				4
FCRL1	B cells	B lineage	Immature Bcells		B cells				4
FCRL3	B cells	B lineage	Immature Bcells		B cells				4
FCRL5	B cells	B lineage	Immature Bcells		B cells				4
FCRLA	B cells	B lineage	Immature Bcells		B cells				4
FCAR		Neutrophils	Macrophages			Neutrophils	Myeloid		4
MS4A7	Macrophages		Macrophages		Monocytes		Myeloid		4
TREM1			Macrophages		Neutrophils		Myeloid	Neutrophils	4
AIF1	Monocytes		Macrophages				Myeloid	common genes	4
CPA3			Mast cells		Megakaryocyte	Mast cells		common genes	4
CTSG			Mast cells		Neutrophils	Mast cells		common genes	4
EMR1			Mast cells		Neutrophils	Eosinophils		Eosinophils	4
PTGS2			Mast cells	Monocytes activated	Neutrophils		Myeloid		4
ABTB1		Neutrophils	Neutrophils		Neutrophils		Neutrophils		4
SLC25A37	Neutrophils	Neutrophils	Neutrophils			Neutrophils			4
NCR1		NK cells	NKT cells		NK cells	NK cells			4
KIR2DL3	NK cells	NK cells	NKT cells			NK56 dim			4
FGFBP2		Cytotoxic cells	T cells	NK cells	NK cells				4
CXCR1		Neutrophils	T cells	Neutrophils				Neutrophils	4
CD1C			T cells		B cells	iDC		common genes	4
BTLA	B cells		T cells		B cells		Lymphoid		4
CD1D			T cells		Monocytes		Monocytes	Monocytes	4
IL1B			T cells		Neutrophils		Monocytes	Mast cells activated	4
SPI1	Macrophages		T cells		Neutrophils		Myeloid		4
LILRB3	Monocytes		T cells		Neutrophils		Myeloid		4
IL12RB2			T cells		NK cells	Th1		common genes	4
CCL17			T cells			Dendritic cells	Dendritic Cells	common genes	4
LCK			T cells			T cells	Lymphoid	common genes	4
IFNG			T cells			Th1	Lymphoid	common genes	4
ITK	T cells		T cells				Lymphoid	common genes	4
CCL22			T cells			Dendritic cells	Myeloid	common genes	4
BCL6	Neutrophils		TFH		Neutrophils		Myeloid		4
FPR3	Macrophages	Monocytic lineage	TGD					common genes	4
CD33	Monocytes		TGD		Monocytes			common genes	4
C1orf54	Macrophages		TGD		Monocytes			Dendritic cells resting	4
MARCO			TGD		Monocytes	Macrophages		Macrophages M0	4
MMP12			TGD			iDC	Dendritic Cells	common genes	4
HK3	Macrophages		TGD				Myeloid	common genes	4
SLAMF8	Macrophages		TGD				Myeloid	common genes	4
SLC15A3	Macrophages		TGD				Myeloid	common genes	4
CD209			TGD	Dendritic cells resting		Dendritic cells		common genes	4
TBX21	NK cells		Th1				Lymphoid	common genes	4
IL17A			Th17	Helper T cells activated		Th17		T cells CD4 memory activated	4
CCR2			Th2		Monocytes	T cells effector memory		Monocytes	4
TLR10	B cells		Treg		B cells		B cells		4
NCF2			Treg		Neutrophils		Myeloid	common genes	4
TLR8	Macrophages		Treg				Myeloid	common genes	4
TLR2	Neutrophils		Treg				Myeloid	common genes	4
CCL19	T cells		Treg				Myeloid	common genes	4
ABCB4		B lineage			B cells	B cells		B cells naive	4
RALGPS2		B lineage			B cells		B cells	common genes	4
KLRC4	NK cells	Cytotoxic cells					Lymphoid	common genes	4
RASSF4		Monocytic lineage			Monocytes		Dendritic Cells	common genes	4
VNN3		Neutrophils			Neutrophils	Neutrophils		Neutrophils	4
BTNL8		Neutrophils		Neutrophils	Neutrophils			Neutrophils	4
CXCR2	Neutrophils	Neutrophils		Neutrophils				Neutrophils	4
PTGDR		NK cells			NK cells		Lymphoid	common genes	4
SIRPG	T cells	T cells				TFH		common genes	4
GNG7					B cells	B cells	B cells	common genes	4
SPIB					B cells	B cells	B cells	common genes	4
BACH2					B cells	B cells	Lymphoid	common genes	4
ALOX15				Dendritic cells resting	Neutrophils		Dendritic Cells	common genes	4
CREB5					Neutrophils	Neutrophils	Myeloid	common genes	4
EMR2	Macrophages				Neutrophils		Myeloid	common genes	4
MGAM	Neutrophils				Neutrophils	Neutrophils		common genes	4
BCL2A1	Macrophages				Neutrophils		Myeloid	Eosinophils	4
GZMB					NK cells	NK56 dim	Lymphoid	common genes	4
KLRF1					NK cells	Cytotoxic cells	NK cells	common genes	4
CXCL5				Monocytes activated		Macrophages	Monocytes	Macrophages M0	4
HELLS			Activated CD4			Th2	Lymphoid		3
FAIM3			B cells activated		B cells			common genes	3
ARHGAP25	T cells		B cells activated		Neutrophils				3
FAM65B	Neutrophils		B cells activated					B cells memory	3
MAP4K1			B cells activated				Lymphoid	common genes	3
CD38			B cells activated			Th1		common genes	3
CD180	B cells		B cells activated					common genes	3
CD27	T cells		B cells activated					common genes	3
TRAF3IP3	T cells		B cells activated			T cells central memory			3
FCER1A			B cells memory		Megakaryocyte			common genes	3
MAL		T cells	Centralmemory CD4		T cells CD4				3
IL6R			Centralmemory CD4		Neutrophils		Myeloid		3
TXK			Centralmemory CD4			T cells central memory		common genes	3
KLRK1			Centralmemory CD8			Cytotoxic cells		common genes	3
CD80			Centralmemory CD8				Myeloid	Dendritic cells activated	3
MSC			Centralmemory CD8				Myeloid	Dendritic cells activated	3
CD300A	Macrophages		Centralmemory CD8					TGD	3
SELL			Cytotoxic cells		Neutrophils			B cells naive	3
LILRA2	Neutrophils		Cytotoxic cells					common genes	3
STAB1			Dendritic cells		Monocytes		Myeloid		3
CSF2RA			Dendritic cells		Neutrophils		Myeloid		3
GPR109B			Dendritic cells		Neutrophils		Myeloid		3
SIGLEC5			Dendritic cells		Neutrophils	Neutrophils			3
THBD	Neutrophils		Dendritic cells		Neutrophils				3
SIGLEC1			Dendritic cells	Dendritic cells activated				common genes	3
UBD			Dendritic cells	Dendritic cells activated			Dendritic Cells		3
INHBA			Dendritic cells	Monocytes activated			Myeloid		3
FN1			Dendritic cells	Monocytes		Macrophages			3
IL15			Effectormemory CD8		Monocytes		Myeloid		3
LY96	Macrophages		Effectormemory CD8		Neutrophils				3
CFLAR	Neutrophils		Effectormemory CD8		Neutrophils				3
CMKLR1	Macrophages		Effectormemory CD8		NK cells				3
CD244			Effectormemory CD8				NK cells	common genes	3
C3AR1	Macrophages		Effectormemory CD8					common genes	3
CCL24			Eosinophils	Monocytes activated			Monocytes		3
IL1RN			iDC		Neutrophils		Monocytes		3
FAM129C	B cells		Immature Bcells		B cells				3
HVCN1	T cells		Immature Bcells		B cells				3
CCL1			Macrophages			Dendritic cells activated		common genes	3
ADAMTS3			Mast cells		Erythroblast			Mast cells resting	3
PTGS1			Mast cells		Megakaryocyte	Mast cells			3
SLC24A3			Mast cells		Megakaryocyte	Mast cells			3
NLRP3			Mast cells		Monocytes			Monocytes	3
MS4A3			Mast cells		Neutrophils			common genes	3
TNFAIP6			Mast cells		Neutrophils			common genes	3
CMA1			Mast cells			Mast cells		common genes	3
HDC			Mast cells			Mast cells		common genes	3
MS4A2			Mast cells			Mast cells		common genes	3
ATP8B4	Macrophages		Mast cells					common genes	3
SERPINB2			Mast cells	Monocytes activated			Monocytes		3
TARP	T cells		Mast cells			TGD			3
FCER2			MDSC		B cells			common genes	3
CD40			MDSC		B cells			Macrophages M1	3
CD14	Monocytes		MDSC		Monocytes				3
TPP1	Monocytes		MDSC		Monocytes				3
ADORA3	Macrophages		MDSC		Neutrophils				3
STAT3	Neutrophils		MDSC		Neutrophils				3
SLA	T cells		MDSC		Neutrophils				3
TBXAS1	Macrophages		MDSC				Myeloid		3
S100A9	Neutrophils		MDSC				Myeloid		3
LITAF			Monocytes		Neutrophils		Myeloid		3
BASP1	Neutrophils		Monocytes		Neutrophils				3
CAMP			Neutrophils		Neutrophils			common genes	3
TNFSF14			Neutrophils		Neutrophils			common genes	3
SEPX1			Neutrophils		Neutrophils		Neutrophils		3
XPO6			Neutrophils		Neutrophils		Neutrophils		3
FASLG			NK cells		NK cells			NK cells activated	3
CRTAM	T cells		NK cells					T cells CD8	3
KLRG1			NK cells				Lymphoid	TGD	3
PILRA	Monocytes		NK cells				Myeloid		3
KLRC1		Cytotoxic cells	NKT cells		NK cells				3
IL3RA			pDC			Dendritic cells activated	Monocytes		3
IRF8			T cells		B cells			common genes	3
LAT			T cells		Megakaryocyte			common genes	3
P2RY14			T cells		Neutrophils			common genes	3
CCR1	Macrophages		T cells		Neutrophils				3
CD247			T cells		NK cells			common genes	3
IL2RA			T cells		T cells CD4			common genes	3
CXCR5			T cells				B cells	common genes	3
CD69			T cells				Lymphoid	common genes	3
ZAP70			T cells				Lymphoid	common genes	3
IL12B			T cells				Myeloid	Dendritic cells activated	3
CCL7			T cells			Macrophages		Macrophages M0	3
IL26			T cells			Th2		T cells CD4 memory activated	3
BATF			T cells			T helper cells	Lymphoid		3
IL24			T cells	Monocytes activated			Monocytes		3
MS4A4A	Macrophages		T cells			Macrophages			3
CCR7	T cells		TFH					common genes	3
PDCD1			TFH			TFH		T cells follicular helper	3
FCGR2B			TGD		B cells			common genes	3
CECR1	Macrophages		TGD		Monocytes				3
SLC7A7	Monocytes		TGD		Monocytes				3
FCGR2A	Macrophages		TGD		Neutrophils				3
ACP5			TGD				Myeloid	common genes	3
TREM2			TGD				Myeloid	common genes	3
GM2A			TGD			Macrophages	Myeloid		3
LIPA	Macrophages		TGD	NK cells activated					3
CD97	Neutrophils		Th1		Neutrophils				3
TNFRSF1A	Neutrophils		Th1		Neutrophils				3
TNFRSF9	T cells		Th1		Neutrophils				3
CD7			Th1				Lymphoid	common genes	3
IL7R	T cells		Th1					common genes	3
ITGAX	Macrophages		Th1				Myeloid		3
IL17F			Th17	Helper T cells activated			T cells		3
RAB27B			Th2		Megakaryocyte			common genes	3
LAMP3			Th2			Dendritic cells activated		common genes	3
SKAP1			Th2			T helper cells		common genes	3
HTR2B			Th2	Dendritic cells activated				common genes	3
UBASH3A	T cells		Th2					common genes	3
CPNE5		B lineage			B cells		B cells		3
SNX22	B cells	B lineage			B cells				3
IGHM		B lineage				B cells		common genes	3
KYNU		Monocytic lineage					Myeloid	common genes	3
REPS2		Neutrophils			Neutrophils			common genes	3
HAL		Neutrophils			Neutrophils			Neutrophils	3
ALPL		Neutrophils			Neutrophils	Neutrophils			3
CYP4F3		Neutrophils			Neutrophils	Neutrophils			3
KCNJ15		Neutrophils			Neutrophils	Neutrophils			3
CMTM2		Neutrophils		Neutrophils	Neutrophils				3
CLEC7A	Macrophages	Neutrophils						common genes	3
KIR3DS1		NK cells				NK56 dim	NK cells		3
FLT3LG		T cells				T cells CD8		common genes	3
CD5		T cells					T cells	Treg	3
ZBTB32					B cells	Th1		B cells memory	3
SP140	T cells				B cells			B cells memory	3
EAF2					B cells		B cells	common genes	3
CCR6	B cells				B cells			common genes	3
BCL11A					B cells	B cells	B cells		3
BLNK					B cells	B cells	B cells		3
OSBPL10					B cells	B cells	B cells		3
QRSL1					B cells	B cells	B cells		3
VIL2					B cells	T cells effector memory	B cells		3
TXNDC5	Plasma cells				B cells		B cells		3
PRG2					Erythroblast	Mast cells		common genes	3
GSTT1					Erythroblast	iDC		Macrophages M2	3
CD70					Erythroblast	Th1		Treg	3
FZD2					Monocytes	iDC		common genes	3
HMOX1	Monocytes				Monocytes		Dendritic Cells		3
CTSB	Macrophages				Monocytes		Myeloid		3
EMILIN2	Monocytes				Monocytes		Myeloid		3
TGFBI	Monocytes				Monocytes		Myeloid		3
CD93	Monocytes				Monocytes	Neutrophils			3
C1QA	Macrophages			Dendritic cells resting	Monocytes				3
CDA					Neutrophils		Neutrophils	common genes	3
CEACAM8					Neutrophils	Mast cells		common genes	3
P2RY13				Neutrophils	Neutrophils			common genes	3
C5AR1	Macrophages				Neutrophils			common genes	3
AQP9	Neutrophils				Neutrophils			common genes	3
GPR97	Neutrophils				Neutrophils			common genes	3
CHST7					Neutrophils		Dendritic Cells	Dendritic cells activated	3
IL5RA					Neutrophils	Eosinophils		Eosinophils	3
SMPD3					Neutrophils	Eosinophils		Eosinophils	3
MMP9					Neutrophils		Monocytes	Macrophages M0	3
HSPA6					Neutrophils		Myeloid	Neutrophils	3
DEFA4					Neutrophils		Lymphoid	NK cells resting	3
CXCL1				Monocytes activated	Neutrophils		Monocytes		3
INDO					Neutrophils	Dendritic cells activated	Myeloid		3
ABHD2					Neutrophils	Eosinophils	Myeloid		3
FPRL1					Neutrophils	Neutrophils	Myeloid		3
KCNJ2	Neutrophils				Neutrophils		Myeloid		3
RNF149	Neutrophils				Neutrophils		Myeloid		3
IL8RA					Neutrophils	Neutrophils	Neutrophils		3
IL8RB					Neutrophils	Neutrophils	Neutrophils		3
KRT23				Neutrophils	Neutrophils		Neutrophils		3
NCF4	Neutrophils				Neutrophils		Neutrophils		3
PHC2	Neutrophils				Neutrophils		Neutrophils		3
RALB	Neutrophils				Neutrophils		Neutrophils		3
MME				Neutrophils	Neutrophils	Neutrophils			3
DYSF	Neutrophils				Neutrophils	Neutrophils			3
IL17RA	Neutrophils				Neutrophils	Th17			3
GLT1D1	Neutrophils			Neutrophils	Neutrophils				3
LAIR2					NK cells	Th2		Treg	3
EDG8					NK cells	NK56 dim	Lymphoid		3
DPP4					T cells CD4	Th1		common genes	3
INPP4B					T cells CD4	T cells central memory	T cells		3
CTSW						Cytotoxic cells	Lymphoid	common genes	3
GZMA						Cytotoxic cells	Lymphoid	common genes	3
NKG7						Cytotoxic cells	Lymphoid	common genes	3
BCL11B						T cells	Lymphoid	common genes	3
GZMM						T cells CD8	Lymphoid	common genes	3
LY9	B cells						Lymphoid	common genes	3
PTPRCAP	T cells						Lymphoid	common genes	3
CXCL3				Monocytes activated			Monocytes	common genes	3
CHI3L1						Macrophages	Myeloid	common genes	3
S100A12						Neutrophils	Myeloid	common genes	3
DUSP2						Cytotoxic cells	T cells	common genes	3
GZMK	T cells						T cells	common genes	3
SH2D1A	T cells					T helper cells		common genes	3
IL1A				Monocytes activated			Monocytes	Mast cells activated	3
HPSE						Neutrophils	Myeloid	Monocytes	3
PASK						TFH	Lymphoid	T cells follicular helper	3
KIAA0125	B cells					B cells	B cells		3
KIR2DS2	NK cells					NK56 dim	NK cells		3
KIR2DS5	NK cells					NK56 dim	NK cells		3
IL22				Helper T cells activated		Th1	T cells		3
LRRN3				Resting cytotoxic T cells		Th1	T cells		3
EXO1			Activated CD4		Erythroblast				2
PSAT1			Activated CD4		Erythroblast				2
CEP55			Activated CD4		Megakaryocyte				2
FBXO5			Activated CD4				Lymphoid		2
MAD2L1			Activated CD4				Lymphoid		2
CCNB1			Activated CD4				T cells		2
CCNB2			Activated CD4				T cells		2
HMMR			Activated CD4				T cells		2
PRC1			Activated CD4				T cells		2
NEIL3			Activated CD4			Th2			2
GAL			Activated CD8		Erythroblast				2
GPT2			Activated CD8		Erythroblast				2
MPZL1			Activated CD8		Neutrophils				2
KIAA0101			Activated CD8				Lymphoid		2
PCNA			Activated CD8				Lymphoid		2
GIMAP4	T cells		B cells activated						2
SORL1			B cells memory		Neutrophils				2
CCNA2			B cells memory				T cells		2
STAT5B	Neutrophils		B cells memory						2
KLF10			Centralmemory CD4		Monocytes				2
TRIB2			Centralmemory CD4					T cells follicular helper	2
SPOCK2			Centralmemory CD4					Treg	2
CYLD			Centralmemory CD4			T cells central memory			2
FYN	T cells		Centralmemory CD4						2
F2R			Centralmemory CD8		Megakaryocyte				2
CHN1			Centralmemory CD8		T cells CD4				2
RGS1			Centralmemory CD8					common genes	2
GPR183			Centralmemory CD8					Eosinophils	2
SLAMF1			Centralmemory CD8					Macrophages M1	2
BTN3A2			Cytotoxic cells				Lymphoid		2
BST2			Cytotoxic cells			Th1			2
IL10RA	T cells		Cytotoxic cells						2
LGMN			Dendritic cells		Megakaryocyte				2
FAM49A			Dendritic cells		Neutrophils				2
CCL3L1			Dendritic cells		NK cells				2
CCL3L3			Dendritic cells		NK cells				2
CLEC5A			Dendritic cells			Macrophages			2
FSTL1			Dendritic cells	Dendritic cells activated					2
PDGFRL			Dendritic cells	Dendritic cells activated					2
C1QC			Dendritic cells	Dendritic cells resting					2
GPX3			Dendritic cells	Dendritic cells resting					2
FCGR1A	Macrophages		Dendritic cells						2
CNOT10			Effectormemory CD4				Dendritic Cells		2
CD55			Effectormemory CD8		Neutrophils				2
PPP4R1			Effectormemory CD8		Neutrophils				2
BIRC3			Effectormemory CD8					Dendritic cells activated	2
EFNA5			Effectormemory CD8					Treg	2
GPR114			Effectormemory CD8				Lymphoid		2
IFI16			Effectormemory CD8				Lymphoid		2
IKZF2			Effectormemory CD8				Lymphoid		2
TYROBP	Macrophages		Effectormemory CD8						2
FGR	Monocytes		Effectormemory CD8						2
FCGR2C	Neutrophils		Effectormemory CD8						2
FBXO16			Eosinophils		B cells				2
RNASE3			Eosinophils		Neutrophils				2
TGM2			iDC		Erythroblast				2
RAB38			iDC		Megakaryocyte				2
FNDC3B			iDC		Neutrophils				2
RRAGD			iDC		Neutrophils				2
CSF1			iDC					Macrophages M0	2
ATP6V1A			iDC				Myeloid		2
RDX			iDC				Myeloid		2
TACSTD2			iDC			iDC			2
TM7SF4			iDC			iDC			2
NCF1			Immature Bcells		Neutrophils				2
P2RY10			Immature Bcells					Eosinophils	2
ETS1			Immature Bcells					T cells CD4 memory resting	2
SP100			Immature Bcells				Lymphoid		2
NCF1B	T cells		Immature Bcells						2
LRP1			Macrophages		Monocytes				2
CCL14			Macrophages					Macrophages M2	2
CPM			Macrophages				Myeloid		2
LILRA1			Macrophages				Myeloid		2
LXN			Mast cells		Erythroblast				2
VAT1			Mast cells		Erythroblast				2
NTRK1			Mast cells					common genes	2
ADCYAP1			Mast cells			Mast cells			2
SCG2			Mast cells			Mast cells			2
SIGLEC6			Mast cells			Mast cells			2
SLC18A2			Mast cells			Mast cells			2
TAL1			Mast cells			Mast cells			2
HEY1			Mast cells			TFH			2
ARHGAP15	T cells		Mast cells						2
RNASE1			MDSC		Erythroblast				2
SLC36A1			MDSC		Erythroblast				2
TFRC			MDSC		Erythroblast				2
SLC44A1			MDSC		Megakaryocyte				2
LGALS3			MDSC		Monocytes				2
ARG1			MDSC		Neutrophils				2
FLOT1			MDSC		Neutrophils				2
GPSM3			MDSC		Neutrophils				2
ST8SIA4			MDSC		Neutrophils				2
GNA15			MDSC				Monocytes		2
PTPRE			MDSC				Myeloid		2
PSAP	Monocytes		MDSC						2
S100A8	Neutrophils		MDSC						2
BIN2	T cells		MDSC						2
C1orf162	T cells		MDSC						2
GIMAP7	T cells		MDSC						2
PARVG	T cells		MDSC						2
ANXA5			Monocytes		Monocytes				2
HIF1A			Monocytes		Neutrophils				2
OLR1			Monocytes		Neutrophils				2
SDCBP			Monocytes		Neutrophils				2
CD300LF	Monocytes		Monocytes						2
GPR77			Neutrophils		Neutrophils				2
SEC14L1			Neutrophils		Neutrophils				2
FPR2			Neutrophils					Neutrophils	2
AMPD2			Neutrophils				Neutrophils		2
CDH2			NK cells		Neutrophils				2
AKT3			NK cells			T cells effector memory			2
C11orf75			NK cells56 bright		Monocytes				2
MPL			NK cells56 dim		Megakaryocyte				2
KIR2DS4			NK cells56 dim					NK cells activated	2
TNFRSF11A			NKT cells					Dendritic cells activated	2
SIRPA			pDC		Neutrophils				2
UGCG			pDC				Myeloid		2
DDX17			pDC			T cells effector memory			2
IRF4			T cells		B cells				2
NAPSB			T cells		B cells				2
LILRB1			T cells		Monocytes				2
PIK3CD			T cells		Neutrophils				2
CCL3			T cells		NK cells				2
IL7			T cells					B cells memory	2
CCL5			T cells					common genes	2
GRAP2			T cells					common genes	2
IL18R1			T cells					common genes	2
IL18RAP			T cells					common genes	2
LILRA3			T cells					common genes	2
IL21			T cells					T cells follicular helper	2
LILRA4			T cells					Treg	2
STAT4			T cells				Lymphoid		2
IL6			T cells				Monocytes		2
RUNX3			T cells			Cytotoxic cells			2
IL21R			T cells			NK56 dim			2
POU2F2	B cells		T cells						2
LAIR1	Macrophages		T cells						2
LILRB4	Macrophages		T cells						2
ITGAL	T cells		T cells						2
CD200			TFH		B cells				2
CD83			TFH		B cells				2
CD84			TFH			Macrophages			2
B3GAT1			TFH			TFH			2
CDK5R1			TFH			TFH			2
TFEC		Monocytic lineage	TGD						2
PLEK			TGD		Megakaryocyte				2
CARD8			TGD		Neutrophils				2
TM6SF1			TGD		Neutrophils				2
CCL18			TGD					common genes	2
CLEC4A			TGD					common genes	2
RNASE6			TGD					common genes	2
FGL2			TGD				Myeloid		2
SLC38A6			TGD				Myeloid		2
FCER1G	Macrophages		TGD						2
GPNMB	Macrophages		TGD						2
TRPV2	Macrophages		TGD						2
ADAM8			Th1		Neutrophils				2
ICAM3			Th1		Neutrophils				2
IRF1			Th1		Neutrophils				2
TLR6			Th1		Neutrophils				2
LTB			Th1					common genes	2
CCR5			Th1					TGD	2
ITGB7			Th1				Lymphoid		2
GPR84			Th1				Monocytes		2
SPN			Th1			NK cells			2
ITGAM	Macrophages		Th1						2
ITGB2	Macrophages		Th1						2
CD48	T cells		Th1						2
CD52	T cells		Th1						2
ILDR1			Th17		B cells				2
CA2			Th17		Erythroblast				2
ABP1			Th17		Neutrophils				2
GPR25			Th17					common genes	2
LTK			Th17			T cells effector memory			2
IL23A	T cells		Th17						2
CALD1			Th2		Megakaryocyte				2
DNAJC12			Th2		Megakaryocyte				2
PLA2G4A			Th2		Megakaryocyte				2
SIGLEC10			Th2		Neutrophils				2
RNF125			Th2				Lymphoid		2
DUSP6			Th2				Monocytes		2
NRP2			Th2				Myeloid		2
PDE4B			Th2			Neutrophils			2
GATA3			Th2			Th2			2
SMAD2			Th2			Th2			2
ASB2			Th2	Resting cytotoxic T cells					2
MYH10			Treg		Erythroblast				2
SELP			Treg		Megakaryocyte				2
IL1RL1			Treg					common genes	2
SIT1			Treg					common genes	2
TLR7			Treg					common genes	2
FOXP3			Treg					Treg	2
RYR1			Treg					Treg	2
RCSD1	T cells		Treg						2
KLHL14		B lineage			B cells				2
IGHD		B lineage						common genes	2
IGHA1		B lineage				B cells			2
IGHG1		B lineage				B cells			2
EBF1	B cells	B lineage							2
IGHV5-78	B cells	B lineage							2
LINC00926	B cells	B lineage							2
LOC100507616	B cells	B lineage							2
IGH	Plasma cells	B lineage							2
IGLC1	Plasma cells	B lineage							2
IGLJ3	Plasma cells	B lineage							2
IGLV1-44	Plasma cells	B lineage							2
EOMES		Cytotoxic cells					Lymphoid		2
ARHGAP26		Neutrophils			Neutrophils				2
BEST1		Neutrophils			Neutrophils				2
CA4		Neutrophils			Neutrophils				2
DGAT2		Neutrophils			Neutrophils				2
DHX34		Neutrophils			Neutrophils				2
LRG1		Neutrophils			Neutrophils				2
MEGF9		Neutrophils			Neutrophils				2
ORM1		Neutrophils			Neutrophils				2
PHOSPHO1		Neutrophils			Neutrophils				2
PI3		Neutrophils			Neutrophils				2
SLC12A6		Neutrophils			Neutrophils				2
TGM3		Neutrophils			Neutrophils				2
TLE3		Neutrophils			Neutrophils				2
FAM212B		Neutrophils						common genes	2
STEAP4		Neutrophils						Neutrophils	2
DOCK5		Neutrophils					Myeloid		2
TNFRSF13B					B cells			B cells memory	2
IL4R					B cells			B cells naive	2
ADAM28					B cells			common genes	2
TMEM156					B cells			common genes	2
UGT2B17					B cells			Plasma cells	2
PACAP					B cells		B cells		2
POU2AF1					B cells		B cells		2
UBE2J1					B cells		B cells		2
RAB30					B cells		Dendritic Cells		2
DFNA5					B cells		Monocytes		2
PTPRO					B cells		Myeloid		2
GLDC					B cells	B cells			2
SYT17					B cells	iDC			2
TMEPAI					B cells	NK56 dim			2
BLR1					B cells	TFH			2
ITM2C				Plasma cells	B cells				2
AFF3	B cells				B cells				2
IGJ	Plasma cells				B cells				2
MYB					Erythroblast			common genes	2
FRMD4A					Erythroblast			Macrophages M2	2
CA8					Erythroblast			T cells follicular helper	2
GYPE					Erythroblast			TGD	2
ELL2					Erythroblast		B cells		2
SPRED2					Erythroblast		Dendritic Cells		2
CDT1					Erythroblast		Lymphoid		2
NDFIP2					Erythroblast		Lymphoid		2
PLD1					Erythroblast		Monocytes		2
SLC11A2					Erythroblast		Myeloid		2
MELK					Erythroblast		T cells		2
KCNH2					Erythroblast	Eosinophils			2
BLVRB					Erythroblast	iDC			2
RAP1GAP					Erythroblast	iDC			2
APOE					Erythroblast	Macrophages			2
CALB2					Erythroblast	Mast cells			2
KIT					Erythroblast	Mast cells			2
LOH11CR2A					Erythroblast	Mast cells			2
TPSB2					Erythroblast	Mast cells			2
ANK1					Erythroblast	Th2			2
P2RX1					Megakaryocyte			common genes	2
PPFIBP1					Megakaryocyte			Dendritic cells resting	2
SRC					Megakaryocyte		Monocytes		2
ARHGAP18					Megakaryocyte		Myeloid		2
NEK6					Megakaryocyte		Myeloid		2
UBE2C					Megakaryocyte		T cells		2
THBS1					Megakaryocyte	Eosinophils			2
ABCC4					Megakaryocyte	Mast cells			2
MAOB					Megakaryocyte	Mast cells			2
SLC30A5					Megakaryocyte	NK cells			2
TBXA2R					Megakaryocyte	NK cells			2
C18orf1					Megakaryocyte	TFH			2
LRP8					Megakaryocyte	Th1			2
PPP1R14A				B cells activated	Megakaryocyte				2
CXCL10					Monocytes			common genes	2
FOSB					Monocytes			common genes	2
ASGR1					Monocytes			Monocytes	2
ASGR2					Monocytes			Monocytes	2
HNMT					Monocytes			Monocytes	2
EHD4					Monocytes		Dendritic Cells		2
OAS1					Monocytes		Dendritic Cells		2
AP1S2					Monocytes		Monocytes		2
PLD3					Monocytes		Monocytes		2
C14orf58					Monocytes		Myeloid		2
CENTA2					Monocytes		Myeloid		2
CPVL					Monocytes		Myeloid		2
CTSZ					Monocytes		Myeloid		2
CYP1B1					Monocytes		Myeloid		2
ECGF1					Monocytes		Myeloid		2
FPRL2					Monocytes		Myeloid		2
KCTD12					Monocytes		Myeloid		2
MAFB					Monocytes		Myeloid		2
P2RX7					Monocytes		Myeloid		2
SLC36A4					Monocytes		Myeloid		2
EMP1					Monocytes	Macrophages			2
SCARB2					Monocytes	Macrophages			2
PID1				Monocytes activated	Monocytes				2
IFI30	Macrophages				Monocytes				2
MAN2B1	Macrophages				Monocytes				2
SCPEP1	Macrophages				Monocytes				2
GRN	Monocytes				Monocytes				2
PRAM1	Monocytes				Monocytes				2
VCAN	Monocytes				Monocytes				2
PSG2					Neutrophils			B cells naive	2
BPI					Neutrophils			common genes	2
EMR3					Neutrophils			common genes	2
FFAR2					Neutrophils			common genes	2
MAK					Neutrophils			common genes	2
MXD1					Neutrophils			common genes	2
QPCT					Neutrophils			common genes	2
RSAD2					Neutrophils			common genes	2
ST3GAL6					Neutrophils			common genes	2
TREML2					Neutrophils			common genes	2
DACH1					Neutrophils			Eosinophils	2
DAPK2					Neutrophils			Eosinophils	2
LRMP					Neutrophils			Eosinophils	2
TRPM6					Neutrophils			Eosinophils	2
CCL23					Neutrophils			Macrophages M2	2
CASP5					Neutrophils			Neutrophils	2
MMP25					Neutrophils			Neutrophils	2
PGLYRP1					Neutrophils			Neutrophils	2
OSM					Neutrophils			NK cells activated	2
ZNF324					Neutrophils			T cells CD4 naive	2
DDOST					Neutrophils		B cells		2
ABTB2					Neutrophils		Dendritic Cells		2
IFIT1					Neutrophils		Dendritic Cells		2
DDEF1					Neutrophils		Monocytes		2
LRRFIP1					Neutrophils		Monocytes		2
BANP					Neutrophils		Myeloid		2
C1orf24					Neutrophils		Myeloid		2
CAMK1D					Neutrophils		Myeloid		2
FRAT1					Neutrophils		Myeloid		2
GCA					Neutrophils		Myeloid		2
GNG10					Neutrophils		Myeloid		2
HLX1					Neutrophils		Myeloid		2
IL13RA1					Neutrophils		Myeloid		2
LRP10					Neutrophils		Myeloid		2
LYN					Neutrophils		Myeloid		2
MBD6					Neutrophils		Myeloid		2
MCL1					Neutrophils		Myeloid		2
NALP12					Neutrophils		Myeloid		2
NINJ1					Neutrophils		Myeloid		2
NUMB					Neutrophils		Myeloid		2
OAZ2					Neutrophils		Myeloid		2
OGFRL1					Neutrophils		Myeloid		2
PBEF1					Neutrophils		Myeloid		2
PTAFR					Neutrophils		Myeloid		2
RASSF2					Neutrophils		Myeloid		2
RASSF3					Neutrophils		Myeloid		2
RIT1					Neutrophils		Myeloid		2
RNF13					Neutrophils		Myeloid		2
RNF24					Neutrophils		Myeloid		2
SLC16A3					Neutrophils		Myeloid		2
SLC6A6					Neutrophils		Myeloid		2
SOD2					Neutrophils		Myeloid		2
TALDO1					Neutrophils		Myeloid		2
TLR1					Neutrophils		Myeloid		2
TNIP1					Neutrophils		Myeloid		2
USP15					Neutrophils		Myeloid		2
ZDHHC18					Neutrophils		Myeloid		2
CTBS					Neutrophils		Neutrophils		2
FRAT2					Neutrophils		Neutrophils		2
LENG4					Neutrophils		Neutrophils		2
MPPE1					Neutrophils		Neutrophils		2
CAT					Neutrophils	Eosinophils			2
GPR44					Neutrophils	Eosinophils			2
HIST1H1C					Neutrophils	Eosinophils			2
SYNJ1					Neutrophils	Eosinophils			2
THBS4					Neutrophils	Eosinophils			2
ELA2					Neutrophils	Mast cells			2
G0S2					Neutrophils	Neutrophils			2
HIST1H2BC					Neutrophils	Neutrophils			2
SLC22A4					Neutrophils	Neutrophils			2
LOC643313					Neutrophils	NK cells			2
TSC22D3					Neutrophils	T cells CD8			2
CASP8					Neutrophils	T cells central memory			2
PCNX					Neutrophils	T cells central memory			2
POLR2J2					Neutrophils	T cells central memory			2
KIAA1324					Neutrophils	TFH			2
MANSC1				Neutrophils	Neutrophils				2
S100P				Neutrophils	Neutrophils				2
MYO1F	Macrophages				Neutrophils				2
TMEM140	Macrophages				Neutrophils				2
RHOG	Monocytes				Neutrophils				2
ACSL1	Neutrophils				Neutrophils				2
IFITM2	Neutrophils				Neutrophils				2
KIAA0247	Neutrophils				Neutrophils				2
LIMK2	Neutrophils				Neutrophils				2
PADI2	Neutrophils				Neutrophils				2
PHF21A	Neutrophils				Neutrophils				2
PREX1	Neutrophils				Neutrophils				2
SSH2	Neutrophils				Neutrophils				2
TMEM154	Neutrophils				Neutrophils				2
AMICA1	T cells				Neutrophils				2
APBB1IP	T cells				Neutrophils				2
ARHGAP9	T cells				Neutrophils				2
EVI2B	T cells				Neutrophils				2
GMFG	T cells				Neutrophils				2
PLEKHF1					NK cells			NK cells resting	2
COLQ					NK cells			TGD	2
CHST12					NK cells		Lymphoid		2
CLIC3					NK cells		NK cells		2
ZBTB16					NK cells	Cytotoxic cells			2
TKTL1					NK cells	Eosinophils			2
PTGDS					NK cells	Macrophages			2
SPON2					NK cells	NK56 dim			2
FEZ1					NK cells	TGD			2
CD40LG					T cells CD4			common genes	2
GAL3ST4					T cells CD4			T cells CD4 naive	2
WNT7A					T cells CD4			T cells CD4 naive	2
SGPP2					T cells CD4		Monocytes		2
DUSP4					T cells CD4	NK56 bright			2
AQP3					T cells CD4	T cells central memory			2
MICAL3						B cells		B cells naive	2
CXCL11							Dendritic Cells	common genes	2
APOBEC3A							Lymphoid	common genes	2
CDK6							Lymphoid	common genes	2
NCR3							Lymphoid	common genes	2
RASGRP2							Lymphoid	common genes	2
NFE2							Myeloid	common genes	2
SLC2A6							Myeloid	common genes	2
DGKA							T cells	common genes	2
LAG3							T cells	common genes	2
LEF1							T cells	common genes	2
TCF7							T cells	common genes	2
TPSAB1						Mast cells		common genes	2
TRBC1						T cells		common genes	2
LIME1						T cells CD8		common genes	2
MEFV						T cells effector memory		common genes	2
CXCL13						TFH		common genes	2
ST8SIA1						TFH		common genes	2
CSF2						Th1		common genes	2
PMCH						Th2		common genes	2
HESX1				Dendritic cells activated				common genes	2
PDCD1LG2				Dendritic cells activated				common genes	2
TNIP3				Monocytes activated				common genes	2
ADAMDEC1	Macrophages							common genes	2
CD4	Macrophages							common genes	2
FES	Monocytes							common genes	2
GUSBP11	Plasma cells							common genes	2
IGLL3P	Plasma cells							common genes	2
MZB1	Plasma cells							common genes	2
GPR171	T cells							common genes	2
LY86	T cells							common genes	2
PVRIG	T cells							common genes	2
TRAC	T cells							common genes	2
NR4A3							Dendritic Cells	Dendritic cells activated	2
EPN2						Eosinophils		Eosinophils	2
RRP12						Eosinophils		Eosinophils	2
PPBP							Monocytes	Macrophages M0	2
DCSTAMP							Myeloid	Macrophages M0	2
COL8A2						Macrophages		Macrophages M0	2
GPC4						Macrophages		Macrophages M0	2
APOL3						Cytotoxic cells		Macrophages M1	2
CXCL9	T cells							Macrophages M1	2
BST1						Neutrophils		Monocytes	2
CCND2							Lymphoid	NK cells activated	2
AMPD1							B cells	Plasma cells	2
MAN1A1							B cells	Plasma cells	2
MANEA							B cells	Plasma cells	2
PDK1							Lymphoid	Plasma cells	2
ZBP1							Lymphoid	Plasma cells	2
IL9							T cells	T cells CD4 memory activated	2
CDC25A				T cells activated				T cells CD4 memory activated	2
ZFP36L2						T cells CD8		T cells CD4 memory resting	2
CHI3L2						TFH		T cells follicular helper	2
ICA1						TFH		T cells follicular helper	2
SLC7A10						TFH		T cells follicular helper	2
TSHR						TFH		T cells follicular helper	2
DTNB						B cells	B cells		2
FSCN1				Dendritic cells activated			Dendritic Cells		2
TBC1D13				Dendritic cells activated			Dendritic Cells		2
RORA						Cytotoxic cells	Lymphoid		2
XCL1						NK cells	Lymphoid		2
XCL2						NK cells	Lymphoid		2
PRKCQ						T cells	Lymphoid		2
TRA@						T cells	Lymphoid		2
PPP1R2						T cells CD8	Lymphoid		2
ATM						T cells central memory	Lymphoid		2
KLF12						T cells central memory	Lymphoid		2
NFATC3						T cells central memory	Lymphoid		2
LIF				T cells activated			Lymphoid		2
SAMD3	NK cells						Lymphoid		2
PRKCH	T cells						Lymphoid		2
RNU2						Eosinophils	Monocytes		2
IL1F9				Monocytes activated			Monocytes		2
MMP1				Monocytes activated			Monocytes		2
SERPINB7				Monocytes activated			Monocytes		2
TFPI2				Monocytes activated			Monocytes		2
CCRL2	Macrophages						Monocytes		2
CTSD	Monocytes						Monocytes		2
FLJ11151						Neutrophils	Myeloid		2
SLC31A2	Macrophages						Myeloid		2
TNFSF13B	Macrophages						Myeloid		2
GNS	Monocytes						Myeloid		2
KIAA0930	Monocytes						Myeloid		2
NFAM1	Monocytes						Myeloid		2
PLXDC2	Monocytes						Myeloid		2
TIMP2	Monocytes						Myeloid		2
KIR2DL2	NK cells						NK cells		2
DNAJB1						T cells CD8	T cells		2
LEPROTL1						T cells CD8	T cells		2
F13A1				Dendritic cells resting		iDC			2
MSR1	Macrophages					Macrophages			2
KIR2DS1	NK cells					NK56 dim			2
KIR3DL3	NK cells					NK56 dim			2
FYB	T cells					T cells central memory			2
FLI1	T cells					T cells effector memory			2
GIMAP5	T cells					T helper cells			2
TRGV9	T cells					TGD			2
ANLN			Activated CD4						1
BRIP1			Activated CD4						1
BUB1B			Activated CD4						1
CASC5			Activated CD4						1
CCNE2			Activated CD4						1
CKAP2L			Activated CD4						1
DLGAP5			Activated CD4						1
DTL			Activated CD4						1
E2F8			Activated CD4						1
ECT2			Activated CD4						1
ESCO2			Activated CD4						1
EXOC6			Activated CD4						1
FIGNL1			Activated CD4						1
IARS			Activated CD4						1
KIF11			Activated CD4						1
KIF18A			Activated CD4						1
KIF20A			Activated CD4						1
KNTC1			Activated CD4						1
MASTL			Activated CD4						1
MTHFD2			Activated CD4						1
NCAPG2			Activated CD4						1
NCAPH			Activated CD4						1
NUF2			Activated CD4						1
RTKN2			Activated CD4						1
ADRM1			Activated CD8						1
AHSA1			Activated CD8						1
C1GALT1C1			Activated CD8						1
CCT5			Activated CD8						1
CCT6B			Activated CD8						1
CETN3			Activated CD8						1
CSE1L			Activated CD8						1
EIF2S1			Activated CD8						1
GEMIN6			Activated CD8						1
MND1			Activated CD8						1
MRPS16			Activated CD8						1
PTRH2			Activated CD8						1
RFC5			Activated CD8						1
SPC25			Activated CD8						1
TIMM13			Activated CD8						1
TIMM8B			Activated CD8						1
TK1			Activated CD8						1
TUBB			Activated CD8						1
TXNDC17			Activated CD8						1
AKNA			B cells activated						1
CCL21			B cells activated						1
CLEC17A			B cells activated						1
CLEC9A			B cells activated						1
CLECL1			B cells activated						1
AICDA			B cells memory						1
CDKN3			B cells memory						1
CLCN5			B cells memory						1
ENPP1			B cells memory						1
FCRL4			B cells memory						1
MYC			B cells memory						1
RUNX2			B cells memory						1
SOX5			B cells memory						1
STAT5A			B cells memory						1
TLR9			B cells memory						1
ADAM19			Centralmemory CD4						1
AHNAK			Centralmemory CD4						1
COL4A1			Centralmemory CD4						1
EPHA4			Centralmemory CD4						1
IPCEF1			Centralmemory CD4						1
MALT1			Centralmemory CD4						1
NXN			Centralmemory CD4						1
OPTN			Centralmemory CD4						1
PLCL2			Centralmemory CD4						1
PNRC1			Centralmemory CD4						1
SMAD4			Centralmemory CD4						1
ADAM23			Centralmemory CD8						1
ATP2B4			Centralmemory CD8						1
BCL2L11			Centralmemory CD8						1
F8			Centralmemory CD8						1
GABARAPL1			Centralmemory CD8						1
PYHIN1			Centralmemory CD8						1
RCAN2			Centralmemory CD8						1
SLFN11			Centralmemory CD8						1
ZEB2			Centralmemory CD8						1
LAT2			Cytotoxic cells						1
SLAMF6			Cytotoxic cells						1
SLAMF7			Cytotoxic cells						1
CCDC88A			Dendritic cells						1
CD300E			Dendritic cells						1
CLEC1A			Dendritic cells						1
CLEC4C			Dendritic cells						1
HLA-DQA2			Dendritic cells						1
NGFR			Dendritic cells						1
PDPN			Dendritic cells						1
PRKAR2B			Dendritic cells						1
SLAMF9			Dendritic cells						1
VCAM1			Dendritic cells						1
BMI1			Effectormemory CD4						1
CASP3			Effectormemory CD4						1
COPB2			Effectormemory CD4						1
DARS			Effectormemory CD4						1
EXOSC9			Effectormemory CD4						1
EZH2			Effectormemory CD4						1
GDE1			Effectormemory CD4						1
IFT74			Effectormemory CD4						1
KLF5			Effectormemory CD4						1
NDUFB9			Effectormemory CD4						1
NUP205			Effectormemory CD4						1
SHCBP1			Effectormemory CD4						1
XRCC6			Effectormemory CD4						1
APOBEC3H			Effectormemory CD8						1
ARHGAP10			Effectormemory CD8						1
ATP10D			Effectormemory CD8						1
DAPP1			Effectormemory CD8						1
DFNB31			Effectormemory CD8						1
DRAM1			Effectormemory CD8						1
FCGR3A			Effectormemory CD8						1
FCRL6			Effectormemory CD8						1
HAPLN3			Effectormemory CD8						1
HLA-DMB			Effectormemory CD8						1
HLA-DPA1			Effectormemory CD8						1
HLA-DPB1			Effectormemory CD8						1
JAKMIP1			Effectormemory CD8						1
NFKBIA			Effectormemory CD8						1
PTPN22			Effectormemory CD8						1
SETD7			Effectormemory CD8						1
SLA2			Effectormemory CD8						1
STXBP1			Effectormemory CD8						1
TLR5			Effectormemory CD8						1
CFD			Eosinophils						1
CREB3			Eosinophils						1
EGR1			Eosinophils						1
EPX			Eosinophils						1
HFE			Eosinophils						1
HIVEP1			Eosinophils						1
HIVEP2			Eosinophils						1
MBP			Eosinophils						1
PRNP			Eosinophils						1
S100A4			Eosinophils						1
SIGLEC8			Eosinophils						1
CHST11			iDC						1
GRP			iDC						1
INPP5F			iDC						1
LPL			iDC						1
LPXN			iDC						1
MMD			iDC						1
PLAU			iDC						1
PLCB2			iDC						1
TIMD4			iDC						1
HDAC9			Immature Bcells						1
KIAA0226			Immature Bcells						1
TAGAP			Immature Bcells						1
TXNIP			Immature Bcells						1
ZCCHC2			Immature Bcells						1
CCL26			Macrophages						1
CD300LB			Macrophages						1
CNR1			Macrophages						1
CNR2			Macrophages						1
ENG			Macrophages						1
IGF1			Macrophages						1
IL34			Macrophages						1
L1CAM			Macrophages						1
LILRA5			Macrophages						1
MS4A8B			Macrophages						1
TREML1			Macrophages						1
ACSL4			Mast cells						1
C19orf59			Mast cells						1
CASQ1			Mast cells						1
DUSP14			Mast cells						1
EGR3			Mast cells						1
FST			Mast cells						1
KRT1			Mast cells						1
MEIS2			Mast cells						1
PLAT			Mast cells						1
RGS16			Mast cells						1
SDPR			Mast cells						1
SIGLEC14			Mast cells						1
TIE1			Mast cells						1
TIMP1			Mast cells						1
TSPAN4			Mast cells						1
ATP5O			mDC						1
CBX1			mDC						1
DNAJC15			mDC						1
ENSA			mDC						1
FOXN3			mDC						1
PRCP			mDC						1
SSB			mDC						1
TPMT			mDC						1
AG2			MDSC						1
CAPS			MDSC						1
CD117			MDSC						1
CD11B			MDSC						1
CD11C			MDSC						1
CD124			MDSC						1
CD15			MDSC						1
CD163L1			MDSC						1
CD1D1			MDSC						1
CD21			MDSC						1
CD23			MDSC						1
CD274			MDSC						1
CD31			MDSC						1
CD35			MDSC						1
CD43			MDSC						1
CD44			MDSC						1
CD66B			MDSC						1
COX2			MDSC						1
CTR9			MDSC						1
EBP			MDSC						1
FAM48A			MDSC						1
FAM70B			MDSC						1
FCGRT			MDSC						1
FERMT3			MDSC						1
FLT1			MDSC						1
GLI4			MDSC						1
GPR34			MDSC						1
HLA-DR			MDSC						1
IDO			MDSC						1
IKZF1			MDSC						1
IL12			MDSC						1
IL13			MDSC						1
IL18BP			MDSC						1
IL1R			MDSC						1
IL4RA			MDSC						1
INPP5D			MDSC						1
ITGA3			MDSC						1
KDR			MDSC						1
KRIT1			MDSC						1
MGAT4A			MDSC						1
NAIP			MDSC						1
NEK3			MDSC						1
NFSF13			MDSC						1
NOG			MDSC						1
PDRG1			MDSC						1
PECAM1			MDSC						1
PIK3R5			MDSC						1
PPP1R2P4			MDSC						1
PTGES2			MDSC						1
RP11			MDSC						1
SELPLG			MDSC						1
STAT6			MDSC						1
TFGFB1			MDSC						1
TFGFB2			MDSC						1
TFGFB3			MDSC						1
TFGFB5			MDSC						1
TGFB2			MDSC						1
VTCN1			MDSC						1
ACTR3			Monocytes						1
ARPC2			Monocytes						1
ATP6V1B2			Monocytes						1
DAZAP2			Monocytes						1
EIF4A1			Monocytes						1
EIF4G2			Monocytes						1
EMP3			Monocytes						1
FTL			Monocytes						1
GABARAP			Monocytes						1
NCOA4			Monocytes						1
RAB1A			Monocytes						1
RHOA			Monocytes						1
SAT1			Monocytes						1
SRGN			Monocytes						1
TEK			Monocytes						1
TMBIM6			Monocytes						1
UBE2D3			Monocytes						1
EMR4P			Neutrophils						1
MAEA			Neutrophils						1
TREML4			Neutrophils						1
AXL			NK cells						1
CYTH1			NK cells						1
GRB2			NK cells						1
LILRB5			NK cells						1
MAPK4			NK cells						1
NOTCH3			NK cells						1
PIK3CG			NK cells						1
PLCG2			NK cells						1
SIGLEC7			NK cells						1
SIGLEC9			NK cells						1
DYNLL1			NK cells56 bright						1
HCP5			NK cells56 bright						1
HDGFRP2			NK cells56 bright						1
KRT86			NK cells56 bright						1
MLST8			NK cells56 bright						1
MYL6B			NK cells56 bright						1
TAX1BP3			NK cells56 bright						1
AKR7A3			NK cells56 dim						1
CLTB			NK cells56 dim						1
FAM27A			NK cells56 dim						1
GLS2			NK cells56 dim						1
GPRC5C			NK cells56 dim						1
GRIN1			NK cells56 dim						1
HLA-E			NK cells56 dim						1
KLHL21			NK cells56 dim						1
KRT80			NK cells56 dim						1
PHRF1			NK cells56 dim						1
PORCN			NK cells56 dim						1
PQBP1			NK cells56 dim						1
PSMC4			NK cells56 dim						1
TEX264			NK cells56 dim						1
UPP1			NK cells56 dim						1
BTN2A2			NKT cells						1
CD101			NKT cells						1
MICB			NKT cells						1
NFATC2IP			NKT cells						1
CBX6			pDC						1
DAB2			pDC						1
HIGD1A			pDC						1
IDH3A			pDC						1
MAGED1			pDC						1
NUCB2			pDC						1
OFD1			pDC						1
OGT			pDC						1
PDIA4			pDC						1
SERTAD2			pDC						1
SPCS3			pDC						1
TMED2			pDC						1
TMX1			pDC						1
ZDHHC17			pDC						1
CCL11			T cells						1
CCR4			T cells						1
CCR8			T cells						1
CXCR4			T cells						1
FLT3			T cells						1
FOSL1			T cells						1
HLA-DRA			T cells						1
HLA-DRB1			T cells						1
HLA-DRB5			T cells						1
HRH2			T cells						1
IL10			T cells						1
IL12RB1			T cells						1
IL27			T cells						1
JAK2			T cells						1
JAK3			T cells						1
LAX1			T cells						1
LCP2			T cells						1
NFATC1			T cells						1
NFKB2			T cells						1
STAT1			T cells						1
TNF			T cells						1
TPRG1			T cells						1
TSLP			T cells						1
UBASH3B			T cells						1
FGF2			TFH						1
FGF7			TGD						1
MRC1			TGD						1
RAB23			TGD						1
SDC2			TGD						1
SPP1			TGD						1
TNFSF8			TGD						1
CD151			Th1						1
CD53			Th1						1
HAVCR2			Th1						1
ICAM1			Th1						1
IL12A			Th1						1
ITGA4			Th1						1
ITGB4			Th1						1
METRNL			Th1						1
PTPRC			Th1						1
B4GALNT4			Th17						1
C2CD4A			Th17						1
C2CD4B			Th17						1
CCDC65			Th17						1
CHRM3			Th17						1
DOC2B			Th17						1
F12			Th17						1
FURIN			Th17						1
IL17C			Th17						1
IL17RC			Th17						1
IL17RE			Th17						1
LONRF3			Th17						1
MOCOS			Th17						1
SH2D6			Th17						1
TNIP2			Th17						1
TRAF3IP2			Th17						1
YBX2			Th17						1
CSRP2			Th2						1
DAPK1			Th2						1
DLC1			Th2						1
GNAI1			Th2						1
OSBPL1A			Th2						1
PHLDA1			Th2						1
RBMS3			Th2						1
TMPRSS3			Th2						1
CD34			Treg						1
GADD45B			Treg						1
GEM			Treg						1
IL9R			Treg						1
MADCAM1			Treg						1
SELE			Treg						1
SFRP1			Treg						1
TGFB1			Treg						1
TIGIT			Treg						1
TRAF1			Treg						1
WIPF1			Treg						1
AC079767.4		B lineage							1
AC128677.4		B lineage							1
AL928768.3		B lineage							1
BMS1P20		B lineage							1
CKAP2		B lineage							1
CLLU1		B lineage							1
CTA-250D10.23		B lineage							1
DTX1		B lineage							1
IGK		B lineage							1
IGKV1-17		B lineage							1
IGKV1-37		B lineage							1
IGKV1OR2-108		B lineage							1
IGLL5		B lineage							1
IGLV4-60		B lineage							1
LOC100129447		B lineage							1
LOC100130458		B lineage							1
LOC100131043		B lineage							1
LOC101929272		B lineage							1
RP11-138I18.2		B lineage							1
SNX29P1		B lineage							1
ADAP2		Monocytic lineage							1
WFDC21P		Myeloid dendritic cells							1
ABHD5		Neutrophils							1
CTB-167B5.2		Neutrophils							1
CYP4F2		Neutrophils							1
IRAK3		Neutrophils							1
KIF13A		Neutrophils							1
LINC00528		Neutrophils							1
LOC100289061		Neutrophils							1
LOC101928717		Neutrophils							1
LOC254896		Neutrophils							1
LRRC4		Neutrophils							1
MIR7109		Neutrophils							1
NATD1		Neutrophils							1
NFE4		Neutrophils							1
NHSL2		Neutrophils							1
PCBP1-AS1		Neutrophils							1
PLIN5		Neutrophils							1
RP11-44F14.8		Neutrophils							1
SKAP2		Neutrophils							1
SLC26A8		Neutrophils							1
TECPR2		Neutrophils							1
AV8S2		T cells							1
CHRM3-AS2		T cells							1
MGC40069		T cells							1
PBX4		T cells							1
THEMIS		T cells							1
TNFRSF25		T cells							1
ACBD3					B cells				1
ADK					B cells				1
ARHGAP17					B cells				1
ARHGAP24					B cells				1
BCAS4					B cells				1
C13orf18					B cells				1
C16orf74					B cells				1
C1orf165					B cells				1
C22orf13					B cells				1
C4orf34					B cells				1
C8orf13					B cells				1
C9orf45					B cells				1
CAMK1G					B cells				1
CDCA7L					B cells				1
CNFN					B cells				1
CNTNAP2					B cells				1
COBLL1					B cells				1
COL4A4					B cells				1
CSNK1G3					B cells				1
CYBASC3					B cells				1
DBNDD1					B cells				1
DNASE1L3					B cells				1
DUS2L					B cells				1
E2F5					B cells				1
EBF					B cells				1
ELL3					B cells				1
FAM3C					B cells				1
FLJ22531					B cells				1
FLJ43505					B cells				1
GGA2					B cells				1
GNG3					B cells				1
GPM6A					B cells				1
HA23					B cells				1
HA24					B cells				1
HB21					B cells				1
HIP1R					B cells				1
HLA-DOA					B cells				1
HLA-DQB1					B cells				1
ID3					B cells				1
IFT57					B cells				1
IGHG2					B cells				1
IGHV1-46					B cells				1
IGHV1-58					B cells				1
IGHV2-26					B cells				1
IGHV3-49					B cells				1
IGKV1-33					B cells				1
IGKV1-9					B cells				1
IGKV1D-33					B cells				1
IGKV1D-43					B cells				1
IGKV1D-8					B cells				1
IGKV2-30					B cells				1
IGKV2-40					B cells				1
IGKV2D-30					B cells				1
IGKV3-11					B cells				1
IGKV3-20					B cells				1
IGKV3D-11					B cells				1
IGKV3D-20					B cells				1
IGKV5-2					B cells				1
IGKV6-21					B cells				1
IGLV8-61					B cells				1
ITPR1					B cells				1
KCNG1					B cells				1
KIAA1407					B cells				1
KMO					B cells				1
LARGE					B cells				1
LOC389641					B cells				1
LOC390712					B cells				1
LOC400509					B cells				1
LOC641700					B cells				1
LOC642299					B cells				1
LOC642701					B cells				1
LOC644641					B cells				1
LOC644908					B cells				1
LOC647606					B cells				1
LOC649812					B cells				1
LOC653761					B cells				1
LOC654191					B cells				1
LOC90925					B cells				1
MOSC2					B cells				1
MOXD1					B cells				1
NAPSA					B cells				1
NP_056002.1					B cells				1
NP_071409.2					B cells				1
NP_659410.3					B cells				1
NP_689963.2					B cells				1
NP_742001.1					B cells				1
NP_775783.1					B cells				1
NT5E					B cells				1
OPN3					B cells				1
PALM2					B cells				1
PAOX					B cells				1
PARM1					B cells				1
PFTK1					B cells				1
PKIG					B cells				1
PLEKHA2					B cells				1
PLEKHF2					B cells				1
PLEKHG1					B cells				1
POLD4					B cells				1
PPAPDC1B					B cells				1
PPM1K					B cells				1
PRKCE					B cells				1
PTPRK					B cells				1
Q13808					B cells				1
Q8N8D0					B cells				1
Q8TB02					B cells				1
RHPN2					B cells				1
RNGTT					B cells				1
RP9					B cells				1
RUNDC2A					B cells				1
SAV1					B cells				1
SDK2					B cells				1
SETBP1					B cells				1
SGCE					B cells				1
SLC2A5					B cells				1
SLC6A16					B cells				1
SNX25					B cells				1
SSPN					B cells				1
ST6GAL1					B cells				1
STAG3					B cells				1
STEAP1					B cells				1
SWP70					B cells				1
SYBU					B cells				1
SYPL1					B cells				1
SYVN1					B cells				1
TCF4					B cells				1
TCL1B					B cells				1
TEAD2					B cells				1
TNFRSF13C					B cells				1
TSPAN13					B cells				1
TSPAN3					B cells				1
UGT8					B cells				1
UVRAG					B cells				1
VAV2					B cells				1
ZCCHC7					B cells				1
ZDHHC23					B cells				1
ZNF154					B cells				1
ZNF342					B cells				1
ZNF532					B cells				1
A2ABD1					Erythroblast				1
A4GALT					Erythroblast				1
ABCB10					Erythroblast				1
ABCC5					Erythroblast				1
ACAT1					Erythroblast				1
ACSBG1					Erythroblast				1
ADCK1					Erythroblast				1
ADD2					Erythroblast				1
ADFP					Erythroblast				1
AFG3L2					Erythroblast				1
AK2					Erythroblast				1
ALAD					Erythroblast				1
ALAS2					Erythroblast				1
ALS2					Erythroblast				1
ALS2CR2					Erythroblast				1
AMHR2					Erythroblast				1
AMMECR1					Erythroblast				1
ANKRD25					Erythroblast				1
APOC1					Erythroblast				1
AQP1					Erythroblast				1
AQP2					Erythroblast				1
ARG2					Erythroblast				1
ARHGAP23					Erythroblast				1
ARL4					Erythroblast				1
ART4					Erythroblast				1
ARV1					Erythroblast				1
ASNS					Erythroblast				1
ASS1					Erythroblast				1
ATAD5					Erythroblast				1
ATF5					Erythroblast				1
ATG4A					Erythroblast				1
ATP1B2					Erythroblast				1
AVPI1					Erythroblast				1
BAALC					Erythroblast				1
BCAR1					Erythroblast				1
BRP44					Erythroblast				1
BSG					Erythroblast				1
BTRC					Erythroblast				1
C16orf73					Erythroblast				1
C18orf10					Erythroblast				1
C18orf56					Erythroblast				1
C1orf198					Erythroblast				1
C20orf108					Erythroblast				1
C20orf46					Erythroblast				1
C2orf32					Erythroblast				1
C6orf117					Erythroblast				1
CA1					Erythroblast				1
CACHD1					Erythroblast				1
CAPRIN2					Erythroblast				1
CBS					Erythroblast				1
CCDC34					Erythroblast				1
CCNE1					Erythroblast				1
CDC42BPA					Erythroblast				1
CDC42EP4					Erythroblast				1
CEP152					Erythroblast				1
CLCN3					Erythroblast				1
CMBL					Erythroblast				1
CPOX					Erythroblast				1
CRISP2					Erythroblast				1
CTSL1					Erythroblast				1
CTXN1					Erythroblast				1
CXADR					Erythroblast				1
DARC					Erythroblast				1
DECR2					Erythroblast				1
DNAJA4					Erythroblast				1
DYRK3					Erythroblast				1
E2F2					Erythroblast				1
E2F4					Erythroblast				1
EEF2K					Erythroblast				1
EGFL8					Erythroblast				1
ELA2A					Erythroblast				1
ENPP3					Erythroblast				1
EPB42					Erythroblast				1
EPOR					Erythroblast				1
ERAF					Erythroblast				1
ERMAP					Erythroblast				1
ESPN					Erythroblast				1
ESRRG					Erythroblast				1
FAM83A					Erythroblast				1
FAM89A					Erythroblast				1
FBXO7					Erythroblast				1
FDXR					Erythroblast				1
FECH					Erythroblast				1
FGFR3					Erythroblast				1
FKBP4					Erythroblast				1
FREQ					Erythroblast				1
GAD1					Erythroblast				1
GADD45GIP1					Erythroblast				1
GALNT5					Erythroblast				1
GATA5					Erythroblast				1
GCHFR					Erythroblast				1
GDF15					Erythroblast				1
GLRX5					Erythroblast				1
GNA11					Erythroblast				1
GPT					Erythroblast				1
GYPA					Erythroblast				1
GYPB					Erythroblast				1
GYPC					Erythroblast				1
HAGH					Erythroblast				1
HBA1					Erythroblast				1
HBA2					Erythroblast				1
HBE1					Erythroblast				1
HBQ1					Erythroblast				1
HBZ					Erythroblast				1
HEATR2					Erythroblast				1
HEBP1					Erythroblast				1
HES5					Erythroblast				1
HES6					Erythroblast				1
HIC2					Erythroblast				1
HIST1H4B					Erythroblast				1
HIST1H4E					Erythroblast				1
HIST2H4					Erythroblast				1
HK1					Erythroblast				1
HLTF					Erythroblast				1
HMBS					Erythroblast				1
HOXB5					Erythroblast				1
HPS1					Erythroblast				1
HSPA4L					Erythroblast				1
IFRD2					Erythroblast				1
IFT122					Erythroblast				1
IGFL2					Erythroblast				1
IPO11					Erythroblast				1
IQWD1					Erythroblast				1
ISG20L1					Erythroblast				1
ISOC2					Erythroblast				1
KEL					Erythroblast				1
KIAA0495					Erythroblast				1
KIAA0859					Erythroblast				1
KIAA1522					Erythroblast				1
KLF1					Erythroblast				1
KRT13					Erythroblast				1
KRT19					Erythroblast				1
LEG7					Erythroblast				1
LEPR					Erythroblast				1
LGALS7					Erythroblast				1
LGR4					Erythroblast				1
LOC440804					Erythroblast				1
LOC643904					Erythroblast				1
LONP1					Erythroblast				1
LRP11					Erythroblast				1
MAGI1					Erythroblast				1
MAOA					Erythroblast				1
MCAT					Erythroblast				1
METAP2					Erythroblast				1
MGST3					Erythroblast				1
MICALL2					Erythroblast				1
MINPP1					Erythroblast				1
MIPEP					Erythroblast				1
MPST					Erythroblast				1
MRPS17					Erythroblast				1
MRPS9					Erythroblast				1
MST1					Erythroblast				1
MUC1					Erythroblast				1
MYL4					Erythroblast				1
MYO1D					Erythroblast				1
NAT14					Erythroblast				1
NFIA					Erythroblast				1
NP_056263.1					Erythroblast				1
NP_056496.1					Erythroblast				1
NP_057452.1					Erythroblast				1
NP_057574.2					Erythroblast				1
NP_060895.1					Erythroblast				1
NP_112203.1					Erythroblast				1
NP_203751.2					Erythroblast				1
NP_619731.1					Erythroblast				1
NSMCE2					Erythroblast				1
OAT					Erythroblast				1
OSBP2					Erythroblast				1
OSBPL6					Erythroblast				1
PCK2					Erythroblast				1
PCSK9					Erythroblast				1
PHLDA3					Erythroblast				1
PIGQ					Erythroblast				1
PIK3R2					Erythroblast				1
PKLR					Erythroblast				1
PLEK2					Erythroblast				1
PLEKHH3					Erythroblast				1
PLVAP					Erythroblast				1
PMP22					Erythroblast				1
PNMT					Erythroblast				1
PPME1					Erythroblast				1
PPOX					Erythroblast				1
PRDX2					Erythroblast				1
PRKAB1					Erythroblast				1
Q13209					Erythroblast				1
Q49A61					Erythroblast				1
Q6ZMM7					Erythroblast				1
Q8N7N0					Erythroblast				1
Q9UDY6-2					Erythroblast				1
RAB3IL1					Erythroblast				1
RARRES1					Erythroblast				1
RASD1					Erythroblast				1
RDH10					Erythroblast				1
RELN					Erythroblast				1
REXO2					Erythroblast				1
RFESD					Erythroblast				1
RHAG					Erythroblast				1
RHD					Erythroblast				1
RHOBTB3					Erythroblast				1
RNF123					Erythroblast				1
RPS6KL1					Erythroblast				1
RUVBL2					Erythroblast				1
S100A3					Erythroblast				1
SCMH1					Erythroblast				1
SDC4					Erythroblast				1
SEC22C					Erythroblast				1
SELENBP1					Erythroblast				1
SETD8					Erythroblast				1
SLC16A9					Erythroblast				1
SLC25A21					Erythroblast				1
SLC25A39					Erythroblast				1
SLC2A1					Erythroblast				1
SLC38A5					Erythroblast				1
SLC43A1					Erythroblast				1
SLC4A1					Erythroblast				1
SLC6A8					Erythroblast				1
SLC6A9					Erythroblast				1
SNCAIP					Erythroblast				1
SOCS2					Erythroblast				1
SORBS1					Erythroblast				1
SPA17					Erythroblast				1
SPATA9					Erythroblast				1
SPTB					Erythroblast				1
SREBF1					Erythroblast				1
STX2					Erythroblast				1
SYCP1					Erythroblast				1
SYNGR1					Erythroblast				1
TAC3					Erythroblast				1
TACC2					Erythroblast				1
TACSTD1					Erythroblast				1
TANC1					Erythroblast				1
TFDP1					Erythroblast				1
TMEM14B					Erythroblast				1
TMEM14C					Erythroblast				1
TMEM56					Erythroblast				1
TMEM63B					Erythroblast				1
TMEM98					Erythroblast				1
TMOD1					Erythroblast				1
TNFRSF19					Erythroblast				1
TNFSF9					Erythroblast				1
TNNI3					Erythroblast				1
TPSD1					Erythroblast				1
TPSG1					Erythroblast				1
TRAP1					Erythroblast				1
TRAPPC6B					Erythroblast				1
TRIB3					Erythroblast				1
TRIM10					Erythroblast				1
TRYA1					Erythroblast				1
TSC22D1					Erythroblast				1
TSPAN17					Erythroblast				1
TSPAN5					Erythroblast				1
TST					Erythroblast				1
TSTA3					Erythroblast				1
TTLL12					Erythroblast				1
TUBB2B					Erythroblast				1
TUBB6					Erythroblast				1
U464					Erythroblast				1
UBAC1					Erythroblast				1
UROS					Erythroblast				1
WDR34					Erythroblast				1
YPEL4					Erythroblast				1
ABHD4					Megakaryocyte				1
ADCY6					Megakaryocyte				1
ALDH7A1					Megakaryocyte				1
ALG10B					Megakaryocyte				1
ALOX12					Megakaryocyte				1
ANGPT1					Megakaryocyte				1
ARHGAP21					Megakaryocyte				1
ARMCX1					Megakaryocyte				1
ARMET					Megakaryocyte				1
ASB9					Megakaryocyte				1
ATP2C1					Megakaryocyte				1
BAMBI					Megakaryocyte				1
BAT5					Megakaryocyte				1
BEX1					Megakaryocyte				1
C10orf38					Megakaryocyte				1
C10orf47					Megakaryocyte				1
C12orf39					Megakaryocyte				1
C14orf149					Megakaryocyte				1
C14orf73					Megakaryocyte				1
C19orf51					Megakaryocyte				1
C1orf150					Megakaryocyte				1
C3orf52					Megakaryocyte				1
C3orf54					Megakaryocyte				1
C3orf60					Megakaryocyte				1
C5					Megakaryocyte				1
C5orf13					Megakaryocyte				1
C5orf23					Megakaryocyte				1
C9orf58					Megakaryocyte				1
CAPN11					Megakaryocyte				1
CAV2					Megakaryocyte				1
CCND1					Megakaryocyte				1
CD109					Megakaryocyte				1
CKB					Megakaryocyte				1
CLEC1B					Megakaryocyte				1
CMTM5					Megakaryocyte				1
COL24A1					Megakaryocyte				1
CPB1					Megakaryocyte				1
CPXM1					Megakaryocyte				1
CSRP1					Megakaryocyte				1
CTDSPL					Megakaryocyte				1
CTTNBP2					Megakaryocyte				1
CXCL2					Megakaryocyte				1
CYYR1					Megakaryocyte				1
DAAM1					Megakaryocyte				1
DAD1					Megakaryocyte				1
DCBLD2					Megakaryocyte				1
DDAH1					Megakaryocyte				1
DDEF2					Megakaryocyte				1
DENND2C					Megakaryocyte				1
DEPDC1					Megakaryocyte				1
DEPDC6					Megakaryocyte				1
DKK1					Megakaryocyte				1
DLK1					Megakaryocyte				1
DNM1L					Megakaryocyte				1
DNM3					Megakaryocyte				1
DNMT3B					Megakaryocyte				1
DOCK1					Megakaryocyte				1
DPPA4					Megakaryocyte				1
DTD1					Megakaryocyte				1
EFHC2					Megakaryocyte				1
EGF					Megakaryocyte				1
ELOVL7					Megakaryocyte				1
EMILIN1					Megakaryocyte				1
ESAM					Megakaryocyte				1
EVI1					Megakaryocyte				1
EXOC3L2					Megakaryocyte				1
F2RL2					Megakaryocyte				1
FABP5					Megakaryocyte				1
FABPE					Megakaryocyte				1
FAIM					Megakaryocyte				1
FAM64A					Megakaryocyte				1
FAM69B					Megakaryocyte				1
FAM98A					Megakaryocyte				1
FHOD1					Megakaryocyte				1
FKBP14					Megakaryocyte				1
FNBP1L					Megakaryocyte				1
FREM1					Megakaryocyte				1
FUNDC1					Megakaryocyte				1
FUT8					Megakaryocyte				1
GAMT					Megakaryocyte				1
GCNT1					Megakaryocyte				1
GJA4					Megakaryocyte				1
GOLT1B					Megakaryocyte				1
GP1BA					Megakaryocyte				1
GP1BB					Megakaryocyte				1
GP5					Megakaryocyte				1
GP6					Megakaryocyte				1
GP9					Megakaryocyte				1
GSTM5					Megakaryocyte				1
GUCY1A3					Megakaryocyte				1
GUCY1B3					Megakaryocyte				1
HGD					Megakaryocyte				1
HMGN1					Megakaryocyte				1
HSD17B14					Megakaryocyte				1
ILK					Megakaryocyte				1
IRX3					Megakaryocyte				1
ISCA1					Megakaryocyte				1
ITGA2					Megakaryocyte				1
ITGA2B					Megakaryocyte				1
ITGA8					Megakaryocyte				1
ITGB5					Megakaryocyte				1
ITPKA					Megakaryocyte				1
KIF2A					Megakaryocyte				1
KLHDC5					Megakaryocyte				1
LAMB2					Megakaryocyte				1
LAPTM4B					Megakaryocyte				1
LIMS1					Megakaryocyte				1
LOC283683					Megakaryocyte				1
LOC346887					Megakaryocyte				1
LOC649260					Megakaryocyte				1
LOC652175					Megakaryocyte				1
LRRC16					Megakaryocyte				1
LRRC32					Megakaryocyte				1
LRRC8B					Megakaryocyte				1
LRRFIP2					Megakaryocyte				1
LSMD1					Megakaryocyte				1
LTBP1					Megakaryocyte				1
LY6G6D					Megakaryocyte				1
MAP1A					Megakaryocyte				1
MAPK12					Megakaryocyte				1
MED12L					Megakaryocyte				1
MEIS1					Megakaryocyte				1
MGLL					Megakaryocyte				1
MLLT11					Megakaryocyte				1
MMRN1					Megakaryocyte				1
MYCN					Megakaryocyte				1
MYEOV					Megakaryocyte				1
MYLK					Megakaryocyte				1
MYOM1					Megakaryocyte				1
MYOZ3					Megakaryocyte				1
NDN					Megakaryocyte				1
NFIB					Megakaryocyte				1
NLK					Megakaryocyte				1
NP_001003693.1					Megakaryocyte				1
NP_054900.1					Megakaryocyte				1
NP_115981.1					Megakaryocyte				1
NP_694978.2					Megakaryocyte				1
NP_997327.1					Megakaryocyte				1
NT5M					Megakaryocyte				1
P2RY1					Megakaryocyte				1
PBX1					Megakaryocyte				1
PCYOX1L					Megakaryocyte				1
PDE5A					Megakaryocyte				1
PDE8B					Megakaryocyte				1
PDGFC					Megakaryocyte				1
PDIA5					Megakaryocyte				1
PHLDB1					Megakaryocyte				1
PHTF1					Megakaryocyte				1
PLA2G3					Megakaryocyte				1
PLCH1					Megakaryocyte				1
PLEKHC1					Megakaryocyte				1
PLOD2					Megakaryocyte				1
PPAPDC3					Megakaryocyte				1
PPIC					Megakaryocyte				1
PRICKLE2					Megakaryocyte				1
PRKACB					Megakaryocyte				1
PRTFDC1					Megakaryocyte				1
PSTPIP2					Megakaryocyte				1
PTGER3					Megakaryocyte				1
PTPLA					Megakaryocyte				1
Q5SQ64					Megakaryocyte				1
Q5TBE2					Megakaryocyte				1
Q6ZTF7					Megakaryocyte				1
Q8NBX4					Megakaryocyte				1
Q96NA9					Megakaryocyte				1
RAB33A					Megakaryocyte				1
RAB3C					Megakaryocyte				1
RAC3					Megakaryocyte				1
RASA1					Megakaryocyte				1
RBPMS2					Megakaryocyte				1
RKHD3					Megakaryocyte				1
ROBO3					Megakaryocyte				1
RRN3					Megakaryocyte				1
RSU1					Megakaryocyte				1
RTN2					Megakaryocyte				1
RYR2					Megakaryocyte				1
SALL2					Megakaryocyte				1
SAMD14					Megakaryocyte				1
SERPINE2					Megakaryocyte				1
SH3GL3					Megakaryocyte				1
SH3PXD2A					Megakaryocyte				1
SHANK3					Megakaryocyte				1
SIAE					Megakaryocyte				1
SLC16A10					Megakaryocyte				1
SLC35D3					Megakaryocyte				1
SLC37A1					Megakaryocyte				1
SLC8A3					Megakaryocyte				1
SMAD6					Megakaryocyte				1
SMTN					Megakaryocyte				1
SNCA					Megakaryocyte				1
SPR					Megakaryocyte				1
ST3GAL3					Megakaryocyte				1
STARD8					Megakaryocyte				1
STS1					Megakaryocyte				1
STXBP5					Megakaryocyte				1
SUCNR1					Megakaryocyte				1
SV2A					Megakaryocyte				1
TCEAL1					Megakaryocyte				1
TCEAL4					Megakaryocyte				1
TCTEX1D1					Megakaryocyte				1
TEAD4					Megakaryocyte				1
TGFB1I1					Megakaryocyte				1
THUMPD2					Megakaryocyte				1
TM7SF2					Megakaryocyte				1
TMEM136					Megakaryocyte				1
TMEM163					Megakaryocyte				1
TMEM45A					Megakaryocyte				1
TMSL8					Megakaryocyte				1
TPM2					Megakaryocyte				1
TPM4					Megakaryocyte				1
TRPC6					Megakaryocyte				1
TSPAN9					Megakaryocyte				1
TTC27					Megakaryocyte				1
TWSG1					Megakaryocyte				1
TYBN					Megakaryocyte				1
URP2					Megakaryocyte				1
VANGL2					Megakaryocyte				1
VCL					Megakaryocyte				1
VEGFC					Megakaryocyte				1
VWF					Megakaryocyte				1
WASF3					Megakaryocyte				1
WBP5					Megakaryocyte				1
WFDC1					Megakaryocyte				1
WNT11					Megakaryocyte				1
WRB					Megakaryocyte				1
WRNIP1					Megakaryocyte				1
XYLT2					Megakaryocyte				1
ZFPM2					Megakaryocyte				1
ACOX2					Monocytes				1
ADAM15					Monocytes				1
ALDH2					Monocytes				1
ANG					Monocytes				1
ANKRD33					Monocytes				1
ANKRD50					Monocytes				1
ANXA2P1					Monocytes				1
APLP2					Monocytes				1
ARSD					Monocytes				1
ASAHL					Monocytes				1
ASB13					Monocytes				1
ATBF1					Monocytes				1
C22orf9					Monocytes				1
C4orf18					Monocytes				1
CACNA2D3					Monocytes				1
CACNA2D4					Monocytes				1
CALML4					Monocytes				1
CD300C					Monocytes				1
CEBPA					Monocytes				1
CES1					Monocytes				1
CG38					Monocytes				1
CLDN23					Monocytes				1
CLEC3B					Monocytes				1
CLEC6A					Monocytes				1
COMMD9					Monocytes				1
CPNE8					Monocytes				1
CRTAP					Monocytes				1
CST3					Monocytes				1
CTSH					Monocytes				1
CYP2S1					Monocytes				1
DAGLA					Monocytes				1
DHRS4					Monocytes				1
DHRS4L2					Monocytes				1
DPYSL2					Monocytes				1
DUSP3					Monocytes				1
EDG3					Monocytes				1
EPB41L3					Monocytes				1
ERICH1					Monocytes				1
EXT1					Monocytes				1
FAM105A					Monocytes				1
FAM20C					Monocytes				1
FBN2					Monocytes				1
FER1L3					Monocytes				1
FOLR2					Monocytes				1
FUCA1					Monocytes				1
FXYD6					Monocytes				1
FZD1					Monocytes				1
GAS7					Monocytes				1
GPBAR1					Monocytes				1
GPR124					Monocytes				1
GPR30					Monocytes				1
GPR35					Monocytes				1
H2AFY					Monocytes				1
HEXB					Monocytes				1
HOMER3					Monocytes				1
HTRA1					Monocytes				1
KIAA1212					Monocytes				1
KIAA1598					Monocytes				1
KLF11					Monocytes				1
KLF4					Monocytes				1
LGALS2					Monocytes				1
LOC162073					Monocytes				1
LOC284837					Monocytes				1
LOC653518					Monocytes				1
LYZ					Monocytes				1
MTMR11					Monocytes				1
NAGA					Monocytes				1
NETO2					Monocytes				1
NFE2L3					Monocytes				1
NP_001034485.1					Monocytes				1
NP_061134.1					Monocytes				1
NP_115986.3					Monocytes				1
NP_940938.1					Monocytes				1
[truncated: 1,660 more rows]

## Sheet: Table S4
Jaccard's index of all signatures
Study	Cell type	Subtype	Becht et al.	Angelova et al.	Angelova et al.	Angelova et al.	Abbas et al. 2009	Watkins et al.	Bindea et al.	Abbas et al. 2005	Newman et al.	Newman et al.	ImSig	Becht et al.	Angelova et al.	Bindea et al.	Abbas et al. 2005	ImSig	Becht et al.	Watkins et al.	Bindea et al.	Newman et al.	Angelova et al.	Bindea et al.	Newman et al.	Angelova et al.	Bindea et al.	Newman et al.	Angelova et al.	Bindea et al.	Angelova et al.	Bindea et al.	Angelova et al.	Bindea et al.	Angelova et al.	Newman et al.	Watkins et al.	Newman et al.	Abbas et al. 2009	Abbas et al. 2009	Newman et al.	Newman et al.	Abbas et al. 2009	Bindea et al.	Bindea et al.	Bindea et al.	Abbas et al. 2009	Newman et al.	ImSig
			B cells	B cells	B cells	B cells	B cells	B cells	B cells	B cells	B cells	B cells	B cells	T cells	T cells	T cells	T cells	T cells	T cells	T cells	T cells	T cells	T cells	T cells	T cells	T cells	T cells	T cells	T cells	T cells	T cells	T cells	T cells	T cells	T cells	T cells	T cells	T cells	T cells	T cells	T cells	T cells	T cells	T cells	T cells	T cells	Plasma cells	Plasma cells	Plasma cells
			B_lineage	B_cells_activated	B_cells_memory	Immature_Bcells	B_cells_activated	B_cells	B_cells	B_cells	B_cells_memory	B_cells_naive	B_cells	T_cells	T_cells	T_cells	T_cells	T_cells	T_cells_CD8	T_cells_CD8	T_cells_CD8	T_cells_CD8	TFH	TFH	TFH	TGD	TGD	TGD	Th1	Th1	Th17	Th17	Th2	Th2	Treg	Treg	T_cells_CD4	T_cells_CD4_naive	Helper_T_cells_activated	T_cells_activated	T_cells_CD4_memory_activated	T_cells_CD4_memory_resting	Resting_cytotoxic_T_cells	T_cells_central_memory	T_cells_effector_memory	T_helper_cells	Plasma_cells	Plasma_cells	Plasma_cells
Angelova et al.	B cells	B_cells_activated	0.01
Angelova et al.	B cells	B_cells_memory	0	0
Angelova et al.	B cells	Immature_Bcells	0.11	0	0
Abbas et al. 2009	B cells	B_cells_activated	0	0	0	0
Watkins et al.	B cells	B_cells	0.07	0.01	0	0.06	0
Bindea et al.	B cells	B_cells	0.08	0.02	0	0.07	0	0.09
Abbas et al. 2005	B cells	B_cells	0.04	0	0	0.02	0	0.07	0.11
Newman et al.	B cells	B_cells_memory	0	0.04	0	0	0	0.02	0	0
Newman et al.	B cells	B_cells_naive	0.02	0	0	0	0	0.01	0.08	0.01	0
ImSig	B cells	B_cells	0.26	0.06	0	0.22	0	0.12	0.16	0.08	0	0.02
Becht et al.	T cells	T_cells	0	0	0	0	0	0	0	0	0	0	0
Angelova et al.	T cells	T_cells	0	0	0	0	0	0.02	0	0.01	0.01	0	0.02	0.03
Bindea et al.	T cells	T_cells	0	0.04	0	0	0	0	0	0	0	0	0	0.17	0.04
Abbas et al. 2005	T cells	T_cells	0	0	0.01	0	0	0	0	0	0	0	0	0.08	0.03	0.03
ImSig	T cells	T_cells	0	0.05	0	0.02	0	0.01	0	0	0.01	0	0	0.07	0.05	0.06	0.06
Becht et al.	T cells	T_cells_CD8	0	0	0	0	0	0	0	0	0	0	0	0	0	0	0	0
Watkins et al.	T cells	T_cells_CD8	0	0	0	0	0	0	0	0	0	0	0	0	0.01	0	0.01	0.01	0
Bindea et al.	T cells	T_cells_CD8	0	0	0	0	0	0	0	0	0	0	0	0.02	0.02	0	0.03	0.01	0	0.05
Newman et al.	T cells	T_cells_CD8	0	0	0	0	0	0	0	0	0	0	0	0	0	0	0	0.01	0	0	0
Angelova et al.	T cells	TFH	0	0	0	0	0	0.01	0	0	0	0	0	0	0	0	0	0.02	0	0	0	0
Bindea et al.	T cells	TFH	0	0	0	0	0	0	0	0	0	0	0	0.02	0	0	0	0.01	0	0	0	0	0.08
Newman et al.	T cells	TFH	0	0	0	0	0	0	0	0	0	0	0	0	0.01	0	0	0	0	0	0	0	0.06	0.17
Angelova et al.	T cells	TGD	0	0	0	0	0	0	0	0	0	0	0	0	0	0	0	0	0	0	0	0	0	0	0
Bindea et al.	T cells	TGD	0	0	0	0	0	0	0	0	0	0	0	0	0	0	0	0.02	0	0	0	0	0	0	0	0
Newman et al.	T cells	TGD	0	0	0	0	0	0	0	0	0	0	0	0	0.01	0	0.01	0.01	0	0	0	0	0	0	0	0	0
Angelova et al.	T cells	Th1	0	0	0	0	0	0.01	0	0	0	0	0.01	0.04	0	0.02	0.01	0.06	0	0	0	0	0	0	0	0	0	0.02
Bindea et al.	T cells	Th1	0	0.02	0	0	0	0	0	0	0.03	0	0	0.02	0.02	0	0.03	0	0	0	0	0	0	0	0	0	0	0	0.02
Angelova et al.	T cells	Th17	0	0	0	0	0	0	0	0	0	0	0	0	0	0	0.01	0.01	0	0	0	0	0	0	0	0	0	0	0	0
Bindea et al.	T cells	Th17	0	0	0	0	0	0	0	0	0	0	0	0	0	0	0	0	0	0	0	0	0	0	0	0	0	0	0	0	0.04
Angelova et al.	T cells	Th2	0	0	0	0	0	0	0	0	0	0	0	0	0	0	0	0.01	0	0	0	0	0	0	0	0	0	0	0	0	0	0
Bindea et al.	T cells	Th2	0	0	0	0	0	0	0	0	0	0	0	0	0.02	0	0.01	0.01	0	0	0	0	0	0	0	0	0	0.03	0	0	0	0	0.04
Angelova et al.	T cells	Treg	0	0	0	0	0	0.01	0.02	0.01	0	0	0.03	0.02	0	0	0.01	0.02	0	0	0	0	0	0	0	0	0	0	0	0.02	0	0	0	0
Newman et al.	T cells	Treg	0	0	0	0	0	0	0	0	0	0	0	0.04	0.01	0	0.01	0	0	0	0	0	0	0	0	0	0	0	0	0.03	0	0	0	0.03	0.06
Watkins et al.	T cells	T_cells_CD4	0	0	0	0	0	0	0	0	0	0	0	0.07	0.01	0.02	0.02	0.02	0	0	0	0	0	0	0	0	0	0	0.01	0.03	0	0	0	0	0.01	0
Newman et al.	T cells	T_cells_CD4_naive	0	0	0	0	0	0	0	0	0	0	0	0	0	0	0	0	0	0	0	0	0	0	0	0	0	0	0	0	0	0	0	0	0	0	0.04
Abbas et al. 2009	T cells	Helper_T_cells_activated	0	0	0	0	0	0	0	0	0	0	0	0	0	0	0.03	0	0	0	0	0	0	0	0	0	0	0	0	0.03	0.07	0.25	0	0	0	0	0	0
Abbas et al. 2009	T cells	T_cells_activated	0	0	0	0	0	0	0	0	0	0	0	0	0	0	0	0	0	0	0	0	0	0	0	0	0	0	0.02	0.03	0	0	0	0	0	0	0	0	0
Newman et al.	T cells	T_cells_CD4_memory_activated	0	0	0	0	0	0	0	0	0	0	0	0	0.01	0	0.01	0	0	0	0	0	0	0	0	0	0	0	0	0	0.03	0.2	0	0.03	0	0	0	0	0.17	0.12
Newman et al.	T cells	T_cells_CD4_memory_resting	0	0	0	0.04	0	0	0	0	0	0	0	0	0	0	0	0	0	0	0.03	0	0	0	0	0	0	0	0	0	0	0	0	0	0	0	0	0	0	0	0
Abbas et al. 2009	T cells	Resting_cytotoxic_T_cells	0	0	0	0	0	0	0	0	0	0	0	0	0	0	0.01	0	0	0.14	0.03	0	0	0	0	0	0	0	0	0.03	0	0	0.04	0	0	0	0	0	0	0	0	0
Bindea et al.	T cells	T_cells_central_memory	0	0.02	0	0	0	0	0	0	0	0	0	0	0	0	0	0.02	0	0	0	0	0	0	0	0	0	0	0	0	0	0	0	0	0	0	0.02	0	0	0	0	0	0
Bindea et al.	T cells	T_cells_effector_memory	0	0	0	0	0	0	0	0.01	0	0	0	0	0	0	0	0.01	0	0	0	0	0	0	0	0	0	0	0	0	0.03	0	0.03	0	0	0	0	0	0	0	0	0	0	0
Bindea et al.	T cells	T_helper_cells	0	0	0	0	0	0	0	0	0	0	0	0.05	0.02	0	0.03	0.06	0	0	0	0	0	0	0	0	0	0	0.03	0	0	0	0.02	0	0	0	0.01	0	0	0	0	0	0	0	0
Abbas et al. 2009	Plasma cells	Plasma_cells	0.01	0.04	0	0	0	0.01	0.05	0	0	0	0	0	0	0	0	0	0	0	0	0	0	0	0	0	0	0	0	0	0	0	0	0	0	0	0	0	0	0	0	0	0	0	0	0
Newman et al.	Plasma cells	Plasma_cells	0	0	0	0	0	0	0	0.03	0	0	0	0	0	0	0	0	0	0	0	0	0	0	0	0	0	0	0	0	0	0	0	0	0	0	0	0	0	0	0	0	0	0	0	0	0
ImSig	Plasma cells	Plasma_cells	0.04	0.03	0	0	0	0.01	0.04	0	0	0	0	0	0	0	0	0	0	0	0	0	0	0	0	0	0	0	0	0	0	0	0	0	0	0	0	0	0	0	0	0	0	0	0	0	0.09	0
Angelova et al.	Cytotoxic cells	Cytotoxic_cells	0	0	0	0	0	0	0	0	0	0.07	0	0	0	0	0	0.02	0	0	0	0	0	0	0	0	0	0	0	0.03	0	0	0	0	0	0	0	0	0	0	0	0	0	0	0	0	0	0	0
Becht et al.	Cytotoxic cells	Cytotoxic_cells	0	0	0	0	0	0	0	0	0	0	0	0	0.02	0	0.01	0.01	0	0.08	0.02	0	0	0	0	0	0	0	0	0	0	0	0	0	0	0	0	0	0	0	0	0	0	0	0	0	0	0	0
Bindea et al.	Cytotoxic cells	Cytotoxic_cells	0	0	0	0	0	0	0	0	0	0	0	0	0.01	0	0.01	0.01	0	0	0	0	0	0	0	0	0	0	0	0	0	0	0	0	0	0	0	0	0	0	0	0	0	0	0	0	0	0	0
Becht et al.	NK cells	NK_cells	0	0	0	0	0	0	0	0	0	0	0	0	0	0	0	0	0	0	0	0	0	0	0	0	0.07	0	0	0	0	0	0	0	0	0	0	0	0	0	0	0	0	0	0	0	0	0	0
Angelova et al.	NK cells	NK_cells	0	0	0	0	0	0	0	0	0	0	0	0	0	0	0	0.01	0	0	0	0.06	0	0	0	0	0	0.05	0	0	0	0	0	0	0	0	0	0	0	0	0	0	0	0	0.03	0	0	0	0
Angelova et al.	NK cells	NK56_bright	0	0	0	0	0	0	0	0	0	0	0	0	0	0	0	0	0	0	0	0	0	0	0	0	0	0	0	0	0	0	0	0	0	0	0	0	0	0	0	0	0	0	0	0	0	0	0
Angelova et al.	NK cells	NK56_dim	0	0	0	0	0	0	0	0	0	0	0	0	0	0	0	0	0	0	0	0	0	0	0	0	0	0	0	0	0	0	0	0	0	0	0	0	0	0	0	0	0	0	0	0	0	0	0
Abbas et al. 2009	NK cells	NK_cells	0	0	0	0	0	0	0	0	0	0	0	0	0.01	0	0	0	0	0	0	0	0	0	0	0	0	0	0	0	0	0	0	0	0	0	0	0	0	0	0	0	0	0	0	0	0	0	0
Abbas et al. 2009	NK cells	NK_cells_activated	0	0	0	0	0	0	0	0	0	0	0	0	0	0	0	0	0	0	0	0	0	0	0	0.02	0	0	0	0	0	0	0	0	0	0	0	0	0	0	0	0	0	0	0	0	0	0	0
Watkins et al.	NK cells	NK_cells	0	0	0	0	0	0	0	0	0	0	0	0	0.03	0	0	0	0	0	0.01	0	0	0	0	0	0.03	0.01	0	0.02	0	0	0	0.01	0	0.01	0	0	0	0	0	0	0	0	0	0	0	0	0
Bindea et al.	NK cells	NK_cells	0	0	0	0	0	0	0	0	0	0	0	0	0	0	0	0	0	0	0	0	0	0	0	0	0	0	0.01	0	0	0	0	0	0	0	0	0	0	0	0	0	0	0	0	0	0	0	0
Bindea et al.	NK cells	NK56_bright	0	0	0	0	0	0	0	0	0	0	0	0	0	0	0	0	0	0	0	0	0	0	0	0	0	0	0	0	0	0	0	0	0	0	0.02	0	0	0	0	0	0	0	0	0	0	0	0
Bindea et al.	NK cells	NK56_dim	0	0	0	0	0	0	0	0	0	0	0	0	0.01	0	0	0	0	0	0	0	0	0	0	0	0	0	0	0	0	0	0	0	0	0	0	0	0	0	0	0	0	0	0	0	0	0	0
Abbas et al. 2005	NK cells	NK_cells	0	0	0	0	0	0	0	0	0	0	0	0	0	0	0	0	0	0	0	0	0	0	0	0	0	0	0	0	0	0	0	0	0	0	0	0	0	0	0	0	0	0	0	0	0	0	0
Newman et al.	NK cells	NK_cells_activated	0	0	0	0	0	0	0	0	0	0	0	0	0	0	0	0	0	0	0	0	0	0	0	0	0	0	0	0	0	0	0	0	0	0	0	0	0	0	0	0	0	0	0	0	0	0	0
Newman et al.	NK cells	NK_cells_resting	0	0	0	0	0	0	0	0	0	0	0	0	0	0	0	0	0	0	0	0	0	0	0	0	0	0	0	0	0	0	0	0	0	0	0	0	0	0	0	0	0	0	0	0	0	0	0
ImSig	NK cells	NK_cells	0	0	0	0	0	0	0	0	0	0	0	0	0.01	0	0	0	0	0	0.02	0	0	0	0	0	0	0	0.02	0	0	0	0	0	0	0	0	0	0	0	0	0	0	0	0	0	0	0	0
Becht et al.	Monocytes	Monocytic_lineage	0	0	0	0	0	0	0	0	0	0	0	0	0	0	0	0	0	0	0	0	0	0	0	0.09	0	0	0	0	0	0	0	0	0	0	0	0	0	0	0	0	0	0	0	0	0	0	0
Angelova et al.	Monocytes	Monocytes	0	0	0	0	0	0	0	0	0	0	0	0	0	0	0	0	0	0	0	0	0	0	0	0	0	0	0	0	0	0	0	0	0	0	0	0	0	0	0	0	0	0	0	0	0	0	0
Abbas et al. 2009	Monocytes	Monocytes	0	0	0	0	0	0	0	0	0	0	0	0	0	0	0	0	0	0	0	0	0	0	0	0	0	0	0	0	0	0	0	0	0	0	0	0	0	0	0	0	0	0	0	0	0	0	0
Abbas et al. 2009	Monocytes	Monocytes_activated	0	0	0	0	0	0	0	0	0	0	0	0	0.01	0	0	0	0	0	0	0	0	0	0	0	0	0	0	0	0	0	0	0	0	0	0	0	0	0	0	0	0	0	0	0	0	0	0
Watkins et al.	Monocytes	Monocytes	0	0	0	0	0	0	0	0	0	0	0	0	0.01	0	0	0	0	0	0	0	0	0	0	0.04	0	0	0	0	0	0	0	0	0	0	0	0	0	0	0	0	0	0	0.01	0	0	0	0
Abbas et al. 2005	Monocytes	Monocytes	0	0	0	0.01	0	0	0	0	0	0	0	0	0.02	0	0	0	0	0	0	0	0	0	0	0.01	0	0	0.01	0	0	0	0.01	0	0	0	0	0	0	0	0	0	0	0	0	0	0	0	0
Newman et al.	Monocytes	Monocytes	0	0	0	0	0	0	0	0	0	0	0	0	0.01	0	0	0	0	0	0	0	0	0	0	0.02	0	0	0	0	0	0	0.03	0	0	0	0	0	0	0	0	0	0	0	0.04	0	0	0	0
ImSig	Monocytes	Monocytes	0	0	0	0	0	0	0	0	0	0	0	0	0.02	0	0	0	0	0	0	0	0	0	0	0.04	0	0	0	0	0	0	0	0	0	0	0	0	0	0	0	0	0	0	0	0	0	0	0
Becht et al.	Neutrophils	Neutrophils	0	0	0	0	0	0	0	0	0	0	0	0	0.01	0	0	0	0	0	0	0	0	0	0	0.02	0	0	0	0	0.01	0	0	0	0	0	0	0	0	0	0	0	0	0	0	0	0	0	0
Angelova et al.	Neutrophils	Neutrophils	0	0	0	0	0	0	0	0	0	0	0	0	0	0	0	0	0	0	0	0	0	0	0	0	0	0	0	0	0	0	0	0	0	0	0	0	0	0	0	0	0	0	0	0	0	0	0
Abbas et al. 2009	Neutrophils	Neutrophils	0	0	0	0	0	0	0	0	0	0	0	0	0.01	0	0	0.01	0	0	0	0	0	0	0	0.02	0	0	0	0	0	0	0	0	0	0	0	0	0	0	0	0	0	0	0	0	0	0	0
Watkins et al.	Neutrophils	Neutrophils	0	0	0	0	0	0	0	0	0	0	0	0	0.01	0	0	0.01	0	0	0	0	0	0	0	0.01	0	0	0.01	0	0	0	0	0	0	0	0	0	0	0	0	0	0	0	0	0	0	0	0
Bindea et al.	Neutrophils	Neutrophils	0	0	0	0	0	0	0	0	0	0	0	0	0.01	0	0	0	0	0	0	0	0	0	0	0.01	0	0	0	0	0.02	0	0.02	0	0	0	0	0	0	0	0	0	0	0	0	0	0	0	0
Abbas et al. 2005	Neutrophils	Neutrophils	0	0	0	0	0	0	0	0	0	0	0	0	0.01	0	0	0	0	0	0	0	0	0	0	0.01	0	0	0	0	0	0	0	0	0	0	0	0	0	0	0	0	0	0	0	0	0	0	0
Newman et al.	Neutrophils	Neutrophils	0	0	0	0	0	0	0	0	0	0	0	0	0.02	0	0	0	0	0	0	0	0	0	0	0.02	0	0	0	0	0.02	0	0	0	0	0	0	0	0	0	0	0	0	0	0	0	0	0	0
ImSig	Neutrophils	Neutrophils	0	0.02	0.02	0	0	0	0	0	0.02	0	0	0	0	0	0	0	0	0	0	0	0.02	0	0	0	0	0	0.02	0	0	0.02	0	0	0.01	0	0	0	0	0	0	0	0	0	0	0	0	0	0
Angelova et al.	Macrophages	Macrophages	0	0	0	0	0	0	0	0	0	0	0	0	0	0	0	0	0	0	0	0	0	0	0	0	0	0	0	0	0	0	0	0	0	0	0	0	0	0	0	0	0	0	0	0	0	0	0
Bindea et al.	Macrophages	Macrophages	0	0	0	0.02	0	0	0	0	0	0	0	0	0.02	0	0	0	0	0	0	0	0.02	0	0	0.03	0	0	0.01	0	0	0	0	0	0	0	0	0	0	0	0	0	0	0	0	0	0	0	0
Newman et al.	Macrophages	Macrophages_M0	0	0	0	0	0	0	0	0	0	0	0	0	0.01	0	0	0	0	0	0	0	0	0	0	0.02	0	0	0	0	0	0	0	0	0	0	0	0	0	0	0	0	0	0	0	0	0	0	0
Newman et al.	Macrophages	Macrophages_M1	0	0	0	0	0	0	0	0	0	0	0	0	0	0	0	0.01	0	0	0	0	0	0	0	0	0	0	0	0	0	0	0	0	0	0	0	0	0	0	0	0	0	0	0	0	0	0	0
Newman et al.	Macrophages	Macrophages_M2	0	0	0	0	0	0	0	0	0	0	0	0	0	0	0	0	0	0	0	0	0	0	0	0.02	0	0	0	0	0	0	0	0	0	0	0	0	0	0	0	0	0	0	0	0	0	0	0
ImSig	Macrophages	Macrophages	0	0	0	0.01	0	0	0	0	0	0	0	0	0.03	0	0	0	0	0	0	0	0	0	0	0.15	0	0.01	0.05	0	0	0	0	0	0.01	0	0	0	0	0	0	0	0	0	0	0	0	0	0
Becht et al.	Dendritic cells	Myeloid_dendritic_cells	0	0	0	0	0	0	0	0	0	0	0	0	0.03	0	0	0	0	0	0	0	0	0	0	0.02	0	0	0	0	0	0	0	0	0	0	0	0	0	0	0	0	0	0	0	0	0	0	0
Angelova et al.	Dendritic cells	Dendritic_cells	0	0	0	0	0	0	0	0	0	0	0	0	0	0	0	0	0	0	0	0	0	0	0	0	0	0	0	0	0	0	0	0	0	0	0	0	0	0	0	0	0	0	0	0	0	0	0
Abbas et al. 2009	Dendritic cells	Dendritic_cells_activated	0	0	0	0	0	0	0	0	0	0	0	0	0	0	0	0	0	0	0	0	0	0	0	0	0	0	0	0	0	0	0.02	0	0	0	0	0	0	0	0	0	0	0	0	0	0	0	0
Abbas et al. 2009	Dendritic cells	Dendritic_cells_resting	0	0	0	0	0	0	0	0	0	0	0	0	0.03	0	0	0	0	0	0	0	0	0	0	0.04	0	0	0	0	0	0	0	0	0	0	0	0	0	0	0	0	0	0	0	0	0	0	0
Bindea et al.	Dendritic cells	Dendritic_cells	0	0	0	0	0	0	0	0	0	0	0	0	0.02	0	0	0	0	0	0	0	0	0	0	0.02	0	0	0	0	0	0	0	0	0	0	0	0	0	0	0	0	0	0	0	0	0	0	0
Bindea et al.	Dendritic cells	Dendritic_cells_activated	0	0	0	0	0	0	0	0	0	0	0	0	0	0	0	0	0	0	0	0	0	0	0	0	0	0	0.02	0	0	0	0.03	0	0	0	0	0	0	0	0	0	0	0	0	0	0	0	0
Abbas et al. 2005	Dendritic cells	Dendritic_Cells	0	0	0	0	0	0	0	0	0	0	0	0	0.03	0	0	0	0	0	0	0	0	0	0	0.01	0	0	0	0	0	0	0	0	0	0	0	0	0	0	0	0	0	0	0	0	0	0	0
Newman et al.	Dendritic cells	Dendritic_cells_activated	0	0	0	0	0	0	0	0	0	0	0	0	0.01	0	0	0	0	0	0	0	0	0	0	0	0	0	0	0	0	0	0	0	0	0	0	0	0	0	0	0	0	0	0	0	0	0	0
Newman et al.	Dendritic cells	Dendritic_cells_resting	0	0	0	0.04	0	0	0.03	0	0	0	0	0	0.01	0	0	0	0	0	0	0	0	0	0	0.02	0	0	0	0	0	0	0	0	0	0	0	0	0	0	0	0	0	0	0	0	0	0	0
Angelova et al.	Dendritic cells	iDC	0	0	0	0	0	0	0	0	0	0	0	0	0	0	0	0	0	0	0	0	0	0	0	0	0	0	0	0	0	0	0	0	0	0	0	0	0	0	0	0	0	0	0	0	0	0	0
Bindea et al.	Dendritic cells	iDC	0	0	0	0	0	0.01	0	0	0	0	0	0	0.04	0	0	0	0	0	0	0	0	0	0	0.06	0	0	0	0	0	0	0	0	0	0	0	0	0	0	0	0	0	0	0	0	0	0	0
Angelova et al.	Mast cells	Mast_cells	0	0	0	0	0	0	0	0	0	0	0	0	0	0	0	0.02	0	0	0	0	0	0.01	0	0	0.02	0	0	0	0	0	0	0	0	0	0	0	0	0	0	0	0	0	0	0	0	0	0
Bindea et al.	Mast cells	Mast_cells	0	0	0	0	0	0	0	0	0	0	0	0	0	0	0	0	0	0	0	0	0	0	0	0	0	0	0	0	0	0	0	0	0	0	0	0	0	0	0	0	0	0	0	0	0	0	0
Newman et al.	Mast cells	Mast_cells_activated	0	0	0	0	0	0	0	0	0	0	0	0	0.01	0	0	0	0	0	0	0	0	0	0	0	0	0	0	0	0	0	0	0	0	0	0	0	0	0	0	0	0	0	0	0	0	0	0
Newman et al.	Mast cells	Mast_cells_resting	0	0	0	0	0	0	0	0	0	0	0	0	0	0	0	0	0	0	0	0	0	0	0	0	0	0	0	0	0	0	0	0	0	0	0	0	0	0	0	0	0	0	0	0	0	0	0
Angelova et al.	Eosinophils	Eosinophils	0	0	0	0	0	0	0	0	0	0	0	0	0	0	0	0	0	0	0	0	0	0	0	0	0	0	0	0	0	0	0	0	0	0	0	0	0	0	0	0	0	0	0	0	0	0	0
Bindea et al.	Eosinophils	Eosinophils	0	0	0	0	0	0	0	0	0	0	0	0	0.01	0	0	0	0	0	0	0	0	0	0	0	0	0	0	0	0	0	0	0	0	0	0	0	0	0	0	0	0	0	0	0	0	0	0
Newman et al.	Eosinophils	Eosinophils	0	0	0	0.03	0	0	0	0	0	0	0	0	0	0	0	0	0	0	0	0	0	0	0	0	0	0	0	0	0	0	0	0	0	0	0	0	0	0	0	0	0	0	0	0	0	0	0
Angelova et al.	Individuals	Activated_CD4	0	0	0	0	0	0	0	0	0	0	0	0	0	0	0.03	0	0	0	0	0	0	0	0	0	0	0	0	0	0	0	0	0.03	0	0	0	0	0	0	0	0	0	0	0	0	0	0	0
Angelova et al.	Individuals	Activated_CD8	0	0	0	0	0	0	0	0	0	0	0	0	0	0	0	0	0	0	0	0	0	0	0	0	0	0	0	0	0	0	0	0	0	0	0	0	0	0	0	0	0	0	0	0	0	0	0
Angelova et al.	Individuals	Centralmemory_CD4	0	0	0	0	0	0	0	0	0.04	0	0	0.03	0	0	0	0.02	0	0	0	0	0	0	0.03	0	0	0	0	0	0	0	0	0	0	0.04	0.02	0	0	0	0	0	0	0.03	0	0	0	0	0
Angelova et al.	Individuals	Centralmemory_CD8	0	0	0	0	0	0	0	0	0	0	0	0	0	0	0	0	0	0	0	0	0	0	0	0	0	0.04	0	0	0	0	0	0	0	0	0.02	0	0	0	0	0	0	0	0	0	0	0	0
Angelova et al.	Individuals	Effectormemory_CD4	0	0	0	0	0	0	0	0	0	0	0	0	0	0	0	0	0	0	0	0	0	0	0	0	0	0	0	0	0	0	0	0	0	0	0	0	0	0	0	0	0	0	0	0	0	0	0
Angelova et al.	Individuals	Effectormemory_CD8	0	0	0	0	0	0	0	0	0	0	0	0	0	0	0	0.01	0	0	0	0	0	0	0	0	0	0	0	0.01	0	0	0	0	0	0.02	0	0	0	0	0	0	0	0	0	0	0	0	0
Angelova et al.	Individuals	mDC	0	0	0	0	0	0	0	0	0	0	0	0	0	0	0	0	0	0	0	0	0	0	0	0	0	0	0	0	0	0	0	0	0	0	0	0	0	0	0	0	0	0	0	0	0	0	0
Angelova et al.	Individuals	MDSC	0.01	0	0	0	0	0.01	0.01	0	0	0	0.01	0	0	0	0	0.03	0	0	0	0	0	0	0	0	0	0	0	0	0	0	0	0	0	0	0	0	0	0	0	0	0	0	0	0	0	0	0
Angelova et al.	Individuals	NKT_cells	0	0	0	0	0	0	0	0	0	0	0	0	0	0	0	0	0	0	0	0	0	0	0	0	0	0	0	0	0	0	0	0	0	0	0	0	0	0	0	0	0	0	0	0	0	0	0
Angelova et al.	Individuals	pDC	0	0	0	0	0	0	0	0	0	0	0	0	0	0	0	0	0	0	0	0	0	0	0	0	0	0	0	0	0	0	0	0	0	0	0	0	0	0	0	0	0	0	0.03	0	0	0	0
Watkins et al.	Individuals	Erythroblast	0	0	0	0	0	0	0	0	0	0	0	0	0	0	0	0	0	0	0	0	0	0	0	0	0	0	0	0	0	0	0	0	0	0	0	0	0	0	0	0	0	0	0	0	0	0	0
Watkins et al.	Individuals	Megakaryocyte	0	0	0	0	0	0	0	0	0	0	0	0	0	0	0	0	0	0	0	0	0	0	0	0	0	0	0	0	0	0	0.01	0	0	0	0	0	0	0	0	0	0	0	0	0	0	0	0
Abbas et al. 2005	Individuals	Lymphoid	0	0.01	0	0	0	0.01	0	0	0	0	0.01	0	0.03	0.02	0	0.02	0	0	0.01	0	0	0	0	0	0	0	0.02	0.01	0	0	0	0	0	0	0	0	0	0.01	0	0	0	0.01	0	0	0	0.01	0
Abbas et al. 2005	Individuals	Myeloid	0	0	0	0	0	0	0	0	0	0	0	0	0.01	0	0	0.01	0	0	0	0	0	0	0	0.04	0	0	0.01	0	0	0	0	0	0.01	0	0	0	0	0	0	0	0	0	0	0	0	0	0
Newman et al.	Individuals	common_genes	0.03	0.02	0	0.01	0	0.05	0.03	0.02	0	0	0.04	0.02	0.06	0.02	0.03	0.06	0	0	0.01	0	0	0.01	0	0.04	0	0	0.03	0.02	0	0	0.01	0	0.02	0	0.01	0	0	0	0	0	0	0	0	0.01	0	0	0.01
ImSig	Individuals	Proliferation	0	0	0.02	0	0	0	0	0	0	0	0	0	0	0	0.08	0	0	0	0	0	0	0	0	0	0	0	0	0	0	0	0	0.02	0	0	0	0	0	0	0	0	0	0	0	0	0	0	0
ImSig	Individuals	Interferon	0	0	0	0	0	0	0	0	0	0	0	0	0.01	0	0	0	0	0	0	0	0	0	0	0	0	0	0	0.01	0	0	0.01	0	0	0	0	0	0	0	0	0	0	0	0	0	0	0	0
ImSig	Individuals	Translation	0	0	0	0	0	0	0	0	0	0	0	0	0	0	0	0	0	0	0	0	0	0	0	0	0	0	0	0	0	0	0	0	0	0	0	0	0	0	0	0	0	0	0	0	0	0	0
[truncated: 75 more columns]

## Sheet: Table S5
Median correlation of signature genes analysed in a tissue dataset (trachoma)
The correlation values were calculated by taking the median correlation between the signatures genes in the dataset under study.
Most signatures correlated very poorly in the tissue dataset while the ImSig signature scored significantly well.
Becht et.al’s signatures were reasonably co-expressed in comparison to the other signatures.
Newman et.al's signature was not included as they are not made of unique genes describing their signatures.
Correlation of signature genes	Grouping	ImSig	Becht et al.	Angelova et al.	Abbas et al. (2009)	Watkins et al.	Bindea et al.	Abbas et al. (2005)
Median Correlation across signatures		0.76	0.69	0.26	0.11	0.08	0.1	0.23
Neutrophils	ImSig	0.7	0.41	0.59	0.38	0.13	0.56	0.36
Monocytes		0.48	0.69	0.31	0.09	0.05		0.22
NK cells		0.82	0.78	0.33		0.14	0	0.62
B cells		0.78	0.58			0.12	0.43	0.19
T cells		0.78	0.72	0.47			0.86	0.32
Plasma cells		0.87			0.22
Macrophages		0.64		0.13			0.13
Proliferation		0.82
Interferon		0.74
Translation		0.75
Activated B cells	B cells			0.68	-0.13		0.25
Immature B cells				0.65
Memory B cells				0.25
Dendritic cells	Dendritic cells		0.18	0.22			0	0.06
Activated dendritic cells					0.12
Resting dendrtitic cells					0.04
Plasmacytoid dendritic cell				0.07			NA
mDC				0.45
iDC				0.02			0.01
CD8 T cells	T cells		NA				0.04
Cytotoxic T cells						0.44
Resting cytotoxic T cells					0.11
Activated cytotoxic T cells					0
T Follicular Helper				0.3			0.08
T helper cells						-0.02	0.09
Activated helper T cells					0.51
Gamma Delta T cells				0.53			0.34
Regulatory T cell				0.26			NA
Central memory T cells							0.1
Effector memory T cells							0.18
Th1 cells				0.64			0.06
Th17 cells				0.16			-0.31
Th2 cells				-0.06			0.04
Cytotoxic lymphocytes			0.8	0.63			0.47
Activated CD4				0.61
Activated CD8				0.16
Central memory CD4	misc			0.2
Effector memory CD4				0.1
Eosinophil				0			0.01
Mast cells				0.11			0.18
Activated Monocytes					0.13
Erythroblast						0.03
Megakaryocyte						0.01
MDSC				0.08
Lymphoid								0.38
Multiple								0.22
Myeloid								0.23
NKT	NK cells			0.42
Activated NK cells					NA
Resting NK cells					NA
